# Supplementary material for: Simulation-Based Assessment of Cholera Epidemic Response: A Case Study of Al-Hudaydah, Yemen
Source: MDPI journal article supplement (doi:10.3390/systems11010003), 2022-12-21
Supplement: s1 [file s1]

**Table S1: Model documentation**

|                                                                | Equation                                                                                                                                                                        | Units       | Documentation                                                                                                                                                                                                                                                                                                                                                                                                                                       |
|----------------------------------------------------------------|---------------------------------------------------------------------------------------------------------------------------------------------------------------------------------|-------------|-----------------------------------------------------------------------------------------------------------------------------------------------------------------------------------------------------------------------------------------------------------------------------------------------------------------------------------------------------------------------------------------------------------------------------------------------------|
| <b>SIR component</b>                                           |                                                                                                                                                                                 |             |                                                                                                                                                                                                                                                                                                                                                                                                                                                     |
| <b>asymptomatic</b>                                            | $\text{MAX}(\text{recently\_infected\_population} \times \text{ratio\_of\_asymptomatic} / \text{average\_incubation\_time}, 0)$                                                 | person /day | "asymptomatic" flow is the rate at which recently infected individuals leave the stock through multiplication with (ratio of asymptomatic) after an average incubation time of 1 day (material delay). The MAX function is to ensure the flow is more than 0.                                                                                                                                                                                       |
| <b>asymptomatic_infection_acquired_immunity_waning</b>         | $\text{MAX}(0, \text{recovered\_asymptomatic\_population} / \text{average\_asymptomatic\_infection\_acquired\_immunity\_period} - \text{vaccination\_recovered\_asymptomatic})$ | person /day | "asymptomatic infection acquired immunity waning" flow is the rate at which recovered asymptomatic individuals leave the stock after an average asymptomatic infection acquired immunity period of 6 months (material delay). The MAX function is to ensure the flow is more than 0. The flow also minus the vaccination flow once the intervention is activated.                                                                                   |
| <b>asymptomatic_population(t)</b>                              | $\text{asymptomatic\_population}(t - dt) + (\text{asymptomatic} - \text{recovered\_from\_asymptomatic} - \text{vaccination\_asymptomatic}) \times dt$                           | person      | "asymptomatic population" are cholera infected individuals who show no symptom. Asymptomatic individuals who shifted to the "asymptomatic population" stock then leave after an average duration of asymptomatic illness of 5 days and flow towards "recovered from asymptomatic population" stock. The "asymptomatic population" is assumed to be 0 initially.                                                                                     |
| <b>average_asymptomatic_infection_acquired_immunity_period</b> | 180                                                                                                                                                                             | day         | Subclinical infections, or infections confirmed by positive stool culture but unaccompanied by diarrhea, have been documented. Leung and Matrajt [1] study highlights the difference between protection from infection and protection from disease. They identified 3 challenge studies in which most participants were reported among the participants without diarrhea on initial challenge developed symptoms upon rechallenge (3 to 12 months). |
| <b>average_duration_of_illness_asymptomatic</b>                | 5                                                                                                                                                                               | day         | The shedding of bacteria typically ends within 7 to 10 days.                                                                                                                                                                                                                                                                                                                                                                                        |
| <b>average_duration_of_illness_symptomatic</b>                 | 9                                                                                                                                                                               | day         | The symptomatic infectious period ranges from 7 to 14 days [2,3]. Médecins Sans Frontières [4] similarly reports bacteria shedding of bacteria among symptomatic patients typically ends within 7 to 10 days. The "average duration of illness symptomatic" uses 9 days.                                                                                                                                                                            |
| <b>average_duration_of_recovery</b>                            | 5                                                                                                                                                                               | day         | Findings indicate that antibiotics reduced volume of stool output by 8–92%, duration of diarrhea by 50–56%, and                                                                                                                                                                                                                                                                                                                                     |

|                                                                              |       |     |                                                                                                                                                                                                                                                                                                                                                                                                                                                                                                                                                                                                                                                                                                                                                                                                                                                                                                                                                                                                                                                                                                                                                                                                                                                                                                                                                                                                                                                                                                                                |
|------------------------------------------------------------------------------|-------|-----|--------------------------------------------------------------------------------------------------------------------------------------------------------------------------------------------------------------------------------------------------------------------------------------------------------------------------------------------------------------------------------------------------------------------------------------------------------------------------------------------------------------------------------------------------------------------------------------------------------------------------------------------------------------------------------------------------------------------------------------------------------------------------------------------------------------------------------------------------------------------------------------------------------------------------------------------------------------------------------------------------------------------------------------------------------------------------------------------------------------------------------------------------------------------------------------------------------------------------------------------------------------------------------------------------------------------------------------------------------------------------------------------------------------------------------------------------------------------------------------------------------------------------------|
| <b>_under_treatm<br/>ent</b>                                                 |       |     | duration of positive bacterial culture by 26–83% [5]. However, mass administration of antibiotics is not recommended, as it has no proven effect on the spread of cholera may contribute to antimicrobial resistance [6]. A patient with severe dehydration or complications may remain hospitalised 4 to 5 days [4]. Hence, the "average duration of recovery under treatment" uses 5 days.                                                                                                                                                                                                                                                                                                                                                                                                                                                                                                                                                                                                                                                                                                                                                                                                                                                                                                                                                                                                                                                                                                                                   |
| <b>average_incuba<br/>tion_time</b>                                          | 1     | day | The incubation period of cholera can range from several hours to 5 days [3,4,7]. The "average incubation time" uses 1 day as the symptomatic individuals will then progress to either mild or severe disease stage with "time to progress to next stage".                                                                                                                                                                                                                                                                                                                                                                                                                                                                                                                                                                                                                                                                                                                                                                                                                                                                                                                                                                                                                                                                                                                                                                                                                                                                      |
| <b>average_sympt<br/>omatic_infectio<br/>n_acquired_im<br/>munity_period</b> | 3*365 | day | Studies found that clinical cholera conferred protection against subsequent cholera for at least 3 years [1,7].                                                                                                                                                                                                                                                                                                                                                                                                                                                                                                                                                                                                                                                                                                                                                                                                                                                                                                                                                                                                                                                                                                                                                                                                                                                                                                                                                                                                                |
| <b>bacteria_shedd<br/>ing_from_asym<br/>ptomatic</b>                         | 0.01  | 1   | <p>Some patients can even be infected with <i>V. cholerae</i> and yet show no symptoms but then tend to shed the organism into the environment, even for only a few days, explaining why vibrios can be isolated in wastewater effluents in a non-Vibrio and/or non-cholera epidemic area [8].</p> <p>According to Kaper, Morris, and Levine [7], doses of <math>10^{11}</math> CFU of <i>V. cholerae</i> were required to consistently cause diarrhea in healthy North American volunteers when the inoculum was given in buffered saline (pH 7.2). When stomach acidity was neutralized with 2 g of sodium bicarbonate immediately prior to administration of the inoculum, attack rates of 90% were seen with an inoculum of <math>10^6</math>. Food has a buffering capacity comparable to that seen with sodium bicarbonate. Ingestion of <math>10^6</math> vibrios with food such as fish and rice resulted in the same high attack rate (100%) as when this inoculum is administered with buffer.</p> <p>For Yemen context, the model uses <math>10^6</math> vibrios as the amount to cause an infection. <math>10^6</math> vibrios is normalized to 1. An asymptomatic infected individual can shed vibrios in the stool in low but potentially infectious concentrations (<math>10^3</math> to <math>10^5</math> <i>V. cholerae</i> organisms per g of stool) for several days [7]. The variable "bacteria shedding from asymptomatic" uses <math>10^4</math>, hence, normalized to <math>10^4/10^6 = 0.67</math></p> |
| <b>bacteria_shedd<br/>ing_from_mildl<br/>y_infected</b>                      | 100   | 1   | <p>According to Nelson et al. [3], a symptomatic, mildly infected individual can shed vibrios in the stool in low but potentially infectious concentrations, up to <math>10^8</math> <i>V. cholerae</i> organisms per g of stool.</p> <p>For Yemen context, the model uses <math>10^6</math> vibrios as the amount to cause an infection. <math>10^6</math> vibrios is normalized to</p>                                                                                                                                                                                                                                                                                                                                                                                                                                                                                                                                                                                                                                                                                                                                                                                                                                                                                                                                                                                                                                                                                                                                       |

|                                                 |                                                                                                          |            |                                                                                                                                                                                                                                                                                                                                                                                                                                                                                                                                                                                                                                                                     |
|-------------------------------------------------|----------------------------------------------------------------------------------------------------------|------------|---------------------------------------------------------------------------------------------------------------------------------------------------------------------------------------------------------------------------------------------------------------------------------------------------------------------------------------------------------------------------------------------------------------------------------------------------------------------------------------------------------------------------------------------------------------------------------------------------------------------------------------------------------------------|
|                                                 |                                                                                                          |            | 1. The variable "bacteria shedding from a mildly infected individual" uses $10^8$ , hence, normalized to $10^8/10^6 = 1.23$                                                                                                                                                                                                                                                                                                                                                                                                                                                                                                                                         |
| <b>bacteria_shedding_from_severely_infected</b> | 1,000,000                                                                                                | 1          | According to Kaper, Morris, and Levine [7], individual with acute cholera excretes $10^7$ to $10^8$ V. cholerae organisms per g of stool; for patients who have 5 to 10 liters of diarrheal stool, total output of V. cholerae can be in the range of $10^{11}$ to $10^{13}$ CFU. Even after cessation of symptoms, patients who have not been treated with antibiotics may continue to excrete vibrios for 1 to 2 weeks. For Yemen context, the model uses $10^6$ vibrios as the amount to cause an infection. $10^6$ vibrios is normalized to 1. The variable "bacteria shedding from severely infected" uses $10^{12}$ , hence, normalized to $10^{12}/10^6 = 2$ |
| <b>become_severe_infected</b>                   | (mildly_infected_population/time_progress_to_next_stage-rehydration_care)*normal_ratio_of_severe_disease | person/day | "become severe infected" flow is the rate at which part of the mildly infected individuals leave the stock through multiplication with the normal ratio of severe disease after the time progress to next stage - 1 day (material delay).                                                                                                                                                                                                                                                                                                                                                                                                                           |
| <b>connectedness_of_aquifers</b>                | 0.02                                                                                                     | 1/day      | The "connectedness of aquifers" is the rate of contact with contaminated water. This is an abstract concept that in the context of this model must be related to the amount of reservoir water consumed, but is not expressed in units that include volume and has no upper or lower bounds [9]. The "connectedness of aquifers" is a simplified and uncertain factor. The variable is calibrated to the historical data, amount to 43% in the base model.                                                                                                                                                                                                          |
| <b>data_IDP</b>                                 | 362292                                                                                                   | person     | Data is obtained from online database from International Organization for Migration [10] who has an IDP tracking system (DTM). Due to the intensified conflict in Al-Hudaydah from June 2018, an increase of IDP from June to November 2018 was recorded: 133830 to 362292 IDP within 6 months.                                                                                                                                                                                                                                                                                                                                                                     |
| <b>duration_IDPs_movement</b>                   | 180                                                                                                      | day        | Data is obtained from online database from International Organization for Migration [10] who has an IDP tracking system (DTM). Due to the intensified conflict in Al-Hudaydah from June 2018, an increase of IDP from June to November 2018 was recorded: 133830 to 362292 IDP within 6 months. Hence, 180 days is used.                                                                                                                                                                                                                                                                                                                                            |
| <b>emergency_treatment</b>                      | IF switch_data_collection =0 THEN emergency_treatment_at_hospital ELSE MAX(emergency_treat               | person/day | "treatment at DTC" flow is the rate at which severe infected individuals leave the stock by seeking treatment at DTC. The flow depends on the fraction severe infected seeking care and it is affected by the ORC strain.                                                                                                                                                                                                                                                                                                                                                                                                                                           |

|                                              |                                                                                                                                                                                                                                                                                                                                                     |            |                                                                                                                                                                                                                                                                                                                                                                                                                                                                                                                                                                                                                                                                                                                    |
|----------------------------------------------|-----------------------------------------------------------------------------------------------------------------------------------------------------------------------------------------------------------------------------------------------------------------------------------------------------------------------------------------------------|------------|--------------------------------------------------------------------------------------------------------------------------------------------------------------------------------------------------------------------------------------------------------------------------------------------------------------------------------------------------------------------------------------------------------------------------------------------------------------------------------------------------------------------------------------------------------------------------------------------------------------------------------------------------------------------------------------------------------------------|
|                                              | <p>ment_at_hospital, seeking_care_at_DTC)</p> <p>{IF switch_DTC=0 THEN severe_infected_population*fraction_severe_infected_seeking_care*effect_of_DTC_strain_on_seeking_emergency_treatment*seeking_care_at_hospital ELSE severe_infected_population*fraction_severe_infected_seeking_care*effect_of_DTC_strain_on_seeking_emergency_treatment}</p> |            |                                                                                                                                                                                                                                                                                                                                                                                                                                                                                                                                                                                                                                                                                                                    |
| <b>emergency_treatment_at_hospital</b>       | <p><math>\text{fraction\_seeking\_care\_at\_hospital} * \text{severe\_infected\_population} / \text{time\_progress\_to\_next\_stage}</math></p>                                                                                                                                                                                                     | person/day | "emergency treatment at hospital" flow is the rate at which mildly infected population seek emergency treatment at hospital.                                                                                                                                                                                                                                                                                                                                                                                                                                                                                                                                                                                       |
| <b>fraction_mildly_infected_seeking_care</b> | 0.3                                                                                                                                                                                                                                                                                                                                                 | 1          | Only symptomatic infections are likely to be reported. Camacho et al. [11] demonstrated that only 32.4% of suspect cholera cases in Yemen visited a DTC on the same day of symptom onset, while for 10.2% of patients it took two or more days to access care (Yemen report). For mildly infected individuals who may experience short period of cholera symptoms and may be clinically indistinguishable from other causes of diarrheal illness, are likely to not seek treatment. Hence, the value is assumed to be 0.1 (less than 0.32 who seek treatment in DTC).                                                                                                                                              |
| <b>fraction_of_Infected_IDP</b>              | 0.1                                                                                                                                                                                                                                                                                                                                                 | 1          | Assuming 10% of the IDP are infected. Many IDPs live in forest, mountainous or desert areas of Hudaydah, which lack services and provide little for shelter, food or water [12].                                                                                                                                                                                                                                                                                                                                                                                                                                                                                                                                   |
| <b>fraction_seeking_care_at_hospital</b>     | 0.15                                                                                                                                                                                                                                                                                                                                                | 1          | if ORC intervention is switch off, assuming 15% of the individuals who would seek treatment at ORC resort to care at the hospital. MSF [4] reported that approximately 15-20% of patients will seek medical care during the peak week (less for rural settings, more for crowded urban settings). However, if ORC and DTC is unavailable, infected individuals are assumed to seek healthcare services at hospitals. Spiegel et al. [13] and Qadri, Islam, and Clemens [14] highlighted that delivery of health care has been limited by the destruction by air strikes of approximately half the health sector facilities, including hospitals and clinics in Yemen. Hence, "seeking care at hospital" uses 0.15. |

|                                              |                                                                                                      |            |                                                                                                                                                                                                                                                                                                                                                                                                                                                                                                                                                                                                                                                                                                                                                                                                                                                                                                                                                                                                                                                                                                                      |
|----------------------------------------------|------------------------------------------------------------------------------------------------------|------------|----------------------------------------------------------------------------------------------------------------------------------------------------------------------------------------------------------------------------------------------------------------------------------------------------------------------------------------------------------------------------------------------------------------------------------------------------------------------------------------------------------------------------------------------------------------------------------------------------------------------------------------------------------------------------------------------------------------------------------------------------------------------------------------------------------------------------------------------------------------------------------------------------------------------------------------------------------------------------------------------------------------------------------------------------------------------------------------------------------------------|
| <b>fraction_severe_infected_seeking_care</b> | 0.4                                                                                                  | 1          | Only symptomatic infections are likely to seek treatment and be reported. Camacho et al. [11] demonstrated that only 32.4% of suspect cholera cases in Yemen visited a DTC on the same day of symptom onset, while for 10.2% of patients it took two or more days to access care (Yemen report). This parameter uses 0.4.                                                                                                                                                                                                                                                                                                                                                                                                                                                                                                                                                                                                                                                                                                                                                                                            |
| <b>immunity_waning_treated_population</b>    | recovered_immune_treated_population/average_symptomatic_infection_acquired_immunity_period           | person/day | "immunity waning treated population" flow is the rate at which all recovered immune treated individuals leave the stock after an average symptomatic infection acquired immunity period of 3 years (material delay) and flow back to the susceptible population.                                                                                                                                                                                                                                                                                                                                                                                                                                                                                                                                                                                                                                                                                                                                                                                                                                                     |
| <b>immunity_waning_untreated_population</b>  | MAX(recovered_immune_untreated_population/average_symptomatic_infection_acquired_immunity_period, 0) | person/day | All recovered symptomatic individuals leave recovered immune untreated population stock after an average symptomatic infection acquired immunity period of 3 years and flow as "immunity waning untreated population" back to the susceptible population. The MAX function is to ensure the flow is more than 0. The flow also minus the vaccination flow once the intervention is activated.                                                                                                                                                                                                                                                                                                                                                                                                                                                                                                                                                                                                                                                                                                                        |
| <b>indicated_ratio_of_severe_disease</b>     | normal_ratio_of_severe_disease*effect_of_ORC_strain_on_fraction_of_severe_disease                    | 1          | The "indicated ratio of severe disease" shows the value of normal ratio of severe disease under the effect of ORC strain on fraction of severe disease. An increase in ORC health services strain leads to a decrease care quality. Hence, more mildly infected individuals progress to severe infected stage.                                                                                                                                                                                                                                                                                                                                                                                                                                                                                                                                                                                                                                                                                                                                                                                                       |
| <b>indirect_degree_of_infection</b>          | connectedness_of_aquifers*smoothed_fraction_of_contaminated_water                                    | 1/day      | <p>Studies have shown that Cholera is most commonly acquired from drinking water in which V. cholerae is found naturally or that has been contaminated by the faeces of an infected individual [3,4,7]. Food may be contaminated when prepared with contaminated water or kitchen utensils, or mixed with other contaminated food, or handled by infected persons in unhygienic conditions.</p> <p>Okoh et al. claimed that V. cholera presence in wastewater, therefore, could be dependent on the number of infected people in the population contributing to the wastewater flow. Once these vibrios get into environmental water, they convert to conditionally viable environmental cells within 24 h [3]. Such vibrios are infectious on reintroduction into a human body. This becomes a major public health problem in underdeveloped areas like the ECP where, as of 2011, about 36 % of the population still got their drinking water directly from rivers and streams [8].</p> <p>According to WHO–UNICEF statistics, in 2014 only 55% had access to drinking water from improved water sources [14].</p> |

|                                             |                                                                                                                                                                                          |             |                                                                                                                                                                                                                                                                                                                                                                                                                                                                                                                                           |
|---------------------------------------------|------------------------------------------------------------------------------------------------------------------------------------------------------------------------------------------|-------------|-------------------------------------------------------------------------------------------------------------------------------------------------------------------------------------------------------------------------------------------------------------------------------------------------------------------------------------------------------------------------------------------------------------------------------------------------------------------------------------------------------------------------------------------|
|                                             |                                                                                                                                                                                          |             | <p>Therefore, in this model, the "indirect rate of infection" equals the product of following two factors: the smoothed fraction of contaminated water and the connectedness of aquifers [9].</p> <p>Although cholera can be transmitted through direct faecal-oral contamination. For example, by eating food that has come into contact with human faeces. This model only incorporates indirect transmission through contaminated water: indirect contamination is assumed to occur much more often than direct contamination [9].</p> |
| <b>Infected_IDP</b>                         | $\text{DELAY}(\text{PULSE}(\text{data\_IDP}, \text{"time\_IDPs\_increase\_to\_Al-hudaydah"}, 0), \text{duration\_IDPs\_movement}) * \text{fraction\_of\_Infected\_IDP}$                  | person /day | A spike in internal displaced persons (IDPs) from August 2018 due to intensified conflict in Al-hudaydah. Pulse function is used to show the increase of IDP that is DELAY over 5 months: to represent the displacement of IDP over time in Al-Hudaydah.                                                                                                                                                                                                                                                                                  |
| <b>infections</b>                           | $\text{susceptible\_population} * \text{indirect\_degree\_of\_infection}$                                                                                                                | person /day | "infections" flow is the product of the susceptible population and the indirect infection rate. When individuals from the susceptible population become infected with cholera, they shift to the recently infected population.                                                                                                                                                                                                                                                                                                            |
| <b>initial_recently_infected_population</b> | 500                                                                                                                                                                                      | person      | OCHA [15] recorded 21 suspected and confirmed cases in 2017. The health seeking ratio in the beginning is 10% of the symptomatic individuals, assuming that there is a lack of DTC and ORC, and perceived of threat among the public. Symptomatic is 25% of total infected individuals [4]. Hence, the estimated total infected individuals is 840 in April. The calibration of the model to historical data resulted as 500 as initial value of recently infected population, it is within a reasonable range.                           |
| <b>mildly_infected</b>                      | $\text{MAX}(\text{recently\_infected\_population} * (1 - \text{ratio\_of\_asymptomatic}) / \text{average\_incubation\_time}, 0)$                                                         | person /day | "mildly infected" flow is the rate at which recently infected individuals leave the stock through multiplication with (1 minus the ratio of asymptomatic) after an average incubation time of 1 day (material delay). The MAX function is to ensure the flow is more than 0.                                                                                                                                                                                                                                                              |
| <b>mildly_infected_population(t)</b>        | $\text{mildly\_infected\_population}(t - dt) + (\text{mildly\_infected} - \text{rehydration\_care} - \text{become\_severe\_infected} - \text{remain\_untreated\_mildly\_infected}) * dt$ | person      | "midly infected population" are mild cases of V. cholerae infection that may be clinically indistinguishable from other causes of diarrheal illness [16]. Mildly infected individuals who shifted to the "mildly infected population" stock then leave after the time progress to next stage - 1 day, and flow to 3 directions: "treated mildly infected population", "untreated mildly infected population" and "severe disease population" stocks. The "asymptomatic population" is assumed to be 0 initially.                          |

|                                             |                                                                                                                                                                                                               |            |                                                                                                                                                                                                                                                                                                                                                                                                                                                                                                                                                                                                                                                                                                                                                                       |
|---------------------------------------------|---------------------------------------------------------------------------------------------------------------------------------------------------------------------------------------------------------------|------------|-----------------------------------------------------------------------------------------------------------------------------------------------------------------------------------------------------------------------------------------------------------------------------------------------------------------------------------------------------------------------------------------------------------------------------------------------------------------------------------------------------------------------------------------------------------------------------------------------------------------------------------------------------------------------------------------------------------------------------------------------------------------------|
| <b>normal_ratio_of_severe_disease</b>       | 0.3                                                                                                                                                                                                           | 1          | <p>The "normal ratio of severe disease" is the ratio of mildly infected population progress into severe disease.</p> <p>Among patients who seek treatment, 25-30% of patients will have severe dehydration, 30-40% some dehydration, and 30-40% no dehydration <sup>4</sup>. Kaper, Morris, and Levine [7] report that, among all cholera infection (including asymptomatic), 11% of patients with classical infections develop severe disease while 15% of classical infections result in moderate illness (defined as cases detected and managed in outpatient clinics). Hence, the "normal ratio of severe disease" is 0.3 in this model, from the symptomatic mildly infected population.</p>                                                                     |
| <b>ratio_of_asymptomatic</b>                | 0.75                                                                                                                                                                                                          | 1          | <p>Depending on the strain involved, 75% of infections remain clinically unapparent while the remaining 25% develop mild to severe symptoms. For example, stomach cramps and vomiting followed by diarrhoea, which may progress to fluid losses of up to 1 litre per hour [4,7].</p>                                                                                                                                                                                                                                                                                                                                                                                                                                                                                  |
| <b>recently_infected_population(t)</b>      | $\text{recently\_infected\_population}(t - dt) + (\text{infections} + \text{Infected\_IDP} - \text{mildly\_infected} - \text{asymptomatic}) * dt$                                                             | person     | <p>Infected individuals who shifted to the "recently infected population" stock then leave after an average incubation time of 1 day and flow towards "mildly infected population" and "asymptomatic population" stocks.</p> <p>The World Health Organization estimates that officially reported cases of cholera represent only 5–10% of the actual number occurring annually worldwide because of inadequate laboratory and epidemiological surveillance systems and economic, social and political disincentives to case reporting [5]. Historical data [15] shows 40 cases in April 2017. Assuming that those are tested symptomatic severe cases and taking into consideration of under-reporting, the "recently infected population" is assumed to be 1000.</p> |
| <b>recovered_asymptomatic_population(t)</b> | $\text{recovered\_asymptomatic\_population}(t - dt) + (\text{recovered\_from\_asymptomatic} - \text{asymptomatic\_infection\_acquired\_immunity\_waning} - \text{vaccination\_recovered\_asymptomatic}) * dt$ | person     | <p>"recovered asymptomatic population" are asymptomatic individuals who recover and become immune because of natural infection. Asymptomatic individuals who shifted to the "recovered asymptomatic population" stock then leave after mild infection-acquired immunity waning of 6 months and flow back to "susceptible population" stock. The "recovered asymptomatic population" is assumed to be 0 initially.</p>                                                                                                                                                                                                                                                                                                                                                 |
| <b>recovered_from_asymptomatic</b>          | $\text{MAX}(\text{asymptomatic\_population} / \text{average\_duration\_of\_illness\_asymptomatic} - \text{vaccination\_asymptomatic}, 0)$                                                                     | person/day | <p>"recovered from asymptomatic" flow is the rate at which asymptomatic individuals leave the stock after an average duration of illness asymptomatic of 5 days (material delay). The MAX function is to ensure the flow is more than 0. The flow also minus the vaccination flow once the intervention is activated.</p>                                                                                                                                                                                                                                                                                                                                                                                                                                             |

|                                                 |                                                                                                                                                                                                                             |             |                                                                                                                                                                                                                                                                                                                                                                                                                                                                                                         |
|-------------------------------------------------|-----------------------------------------------------------------------------------------------------------------------------------------------------------------------------------------------------------------------------|-------------|---------------------------------------------------------------------------------------------------------------------------------------------------------------------------------------------------------------------------------------------------------------------------------------------------------------------------------------------------------------------------------------------------------------------------------------------------------------------------------------------------------|
| <b>recovered_from_treated_mild_infection</b>    | $\text{treated\_mildly\_infected\_population} * (1 - \text{indicated\_ratio\_of\_severe\_disease}) / \text{average\_duration\_of\_illness\_symptomatic}$                                                                    | person /day | "recovered from treated mild infection" flow is the rate at which part of the treated mildly infected individuals, through multiplication with (1 minus indicated ratio of severe disease), leaves the stock after an average duration of illness asymptomatic of 9 days (material delay).                                                                                                                                                                                                              |
| <b>recovered_from_treated_severe_infection</b>  | $\text{treated\_severe\_infected\_population} / \text{average\_duration\_of\_recovery\_under\_treatment} - \text{treated\_death}$                                                                                           | person /day | "recovered from treated severe infection" flow is the rate at which most of the treated severe disease individuals leave the stock after an average duration of illness asymptomatic of 9 days (material delay) and flow as "recovered from treated severe infection" to the recovered immune treated population after minus the treated death flow.                                                                                                                                                    |
| <b>recovered_from_untreated_mild_infection</b>  | $\text{untreated\_mildly\_infected\_population} / \text{average\_duration\_of\_illness\_symptomatic}$                                                                                                                       | person /day | "recovered from untreated mild infection" flow is the rate at which all of the untreated mildly infected individuals leaves the stock after an average duration of illness symptomatic of 9 days (material delay).                                                                                                                                                                                                                                                                                      |
| <b>recovered_from_untreated_severe_disease</b>  | $\text{untreated\_severe\_infected\_population} / \text{average\_duration\_of\_illness\_symptomatic} - \text{untreated\_deaths}$                                                                                            | person /day | "recovered from untreated severe infection" flow is the rate at which all of the untreated severe infected individuals leaves the stock after an average duration of illness symptomatic of 9 days (material delay). The flow also minus the untreated deaths flow.                                                                                                                                                                                                                                     |
| <b>recovered_immune_treated_population(t)</b>   | $\text{recovered\_immune\_treated\_population}(t - dt) + (\text{recovered\_from\_treated\_mild\_infection} + \text{recovered\_from\_treated\_severe\_infection} - \text{immunity\_waning\_treated\_population}) * dt$       | person      | "recovered immune treated population" are symptomatic individuals who recover and become immune because of natural infection with treatment. Treated symptomatic individuals, both mild and severe disease, who shifted to the "recovered a immune treated population" stock then leave after average symptomatic infection acquired immunity period of 3 years and flow back to "susceptible population" stock. The "recovered immune treated population" is assumed to be 0 initially.                |
| <b>recovered_immune_untreated_population(t)</b> | $\text{recovered\_immune\_untreated\_population}(t - dt) + (\text{recovered\_from\_untreated\_mild\_infection} + \text{recovered\_from\_untreated\_severe\_disease} - \text{immunity\_waning\_untreated\_population}) * dt$ | person      | "recovered immune untreated population" are symptomatic individuals who recover and become immune because of natural infection without any treatment. Untreated symptomatic individuals, both mild and severe disease, who shifted to the "recovered a immune untreated population" stock then leave after average symptomatic infection acquired immunity period of 3 years and flow back to "susceptible population" stock. The "recovered immune untreated population" is assumed to be 0 initially. |
| <b>rehydration_care</b>                         | IF<br>switch_data_collection<br>=0 THEN<br>rehydration_care_at_hospital ELSE                                                                                                                                                | person /day | "treatment at ORC" flow is the rate at which mildly infected individuals leave the stock by seeking treatment at ORC. The flow depends on the fraction mildly infected seeking care and it is affected by the ORC strain. If there is no ORC,                                                                                                                                                                                                                                                           |



|                                         |                                                                                                                                                                                                          |            |                                                                                                                                                                                                                                                                                                                                                                                                                                                                                                                               |
|-----------------------------------------|----------------------------------------------------------------------------------------------------------------------------------------------------------------------------------------------------------|------------|-------------------------------------------------------------------------------------------------------------------------------------------------------------------------------------------------------------------------------------------------------------------------------------------------------------------------------------------------------------------------------------------------------------------------------------------------------------------------------------------------------------------------------|
|                                         | $\text{MAX}(\text{rehydration\_care\_at\_hospital}, \text{seeking\_care\_at\_ORC})$                                                                                                                      |            | infected individuals would need to rely on the current health facilities. Hence, a MAX function is used.                                                                                                                                                                                                                                                                                                                                                                                                                      |
| <b>rehydration_care_at_hospital</b>     | $(\text{mildly\_infected\_population}/\text{time\_progress\_to\_next\_stage}) * \text{fraction\_seeking\_care\_at\_hospital}$                                                                            | person/day | "rehydration care at hospital" flow is the rate at which mildly infected population seek rehydration care at hospital.                                                                                                                                                                                                                                                                                                                                                                                                        |
| <b>remain_untreated_mildly_infected</b> | $\text{mildly\_infected\_population}/\text{time\_progress\_to\_next\_stage} - \text{rehydration\_care\_become\_severe\_infected}$                                                                        | person/day | "remain untreated mildly infected" flow is the rate at which mildly infected individuals leave the stock through multiplication with (1 minus the normal ratio of severe disease) after the time progress to next stage - 1 day (material delay). The MAX function is to ensure the flow is more than 0. The flow also minus the treatment at ORC rate once the intervention is activated.                                                                                                                                    |
| <b>remain_untreated_severe_infected</b> | $\text{MAX}((\text{severe\_infected\_population}/\text{time\_progress\_to\_next\_stage}) - \text{emergency\_treatment}, 0)$                                                                              | person/day | "remain untreated severe infected" flow is the rate at which severe infected individuals leave the stock through multiplication with (1 minus the untreated fatality ratio) after the time progress to next stage - 1 day (material delay). The MAX function is to ensure the flow is more than 0. The flow also minus the treatment at DTC rate once the intervention is activated.                                                                                                                                          |
| <b>seeking_care_at_DTC</b>              | $\text{effect\_of\_DTC\_strain\_on\_seeking\_emergency\_treatment} * \text{fraction\_severe\_infected\_seeking\_care} * \text{severe\_infected\_population}/\text{time\_progress\_to\_next\_stage}$      | person/day | "rehydration care at DTC" flow is the rate at which severe infected population seek emergency care at DTC.                                                                                                                                                                                                                                                                                                                                                                                                                    |
| <b>seeking_care_at_ORC</b>              | $(\text{mildly\_infected\_population}/\text{time\_progress\_to\_next\_stage}) * \text{fraction\_mildly\_infected\_seeking\_care} * \text{effect\_of\_ORC\_strain\_on\_people\_seeking\_hydration\_care}$ | person/day | "seeking care at ORC" flow is the rate at which mildly infected population seek rehydration care at ORC.                                                                                                                                                                                                                                                                                                                                                                                                                      |
| <b>severe_infected_population(t)</b>    | $\text{severe\_infected\_population}(t - dt) + (\text{become\_severe\_infected} - \text{remain\_untreated\_severe\_infected} - \text{emergency\_treatment}) * dt$                                        | person     | "severe infected population" are severe cases of V. cholerae infection that is characterized by a sudden onset of acute voluminous watery diarrhoea described as 'rice water stools' and vomiting leading to rapid volume depletion and death if left untreated [4,7]. Mildly infected individuals who shifted to the "severe infected population" stock then leave after the time progress to next stage - 1 day, and flow to 3 directions: "treated severe infected population", "untreated severe infected population" and |

|                                                |                                                                                                                                                                                                                                                                                                        |        |                                                                                                                                                                                                                                                                                                                                                                                                                                                                                                                                                                                                                                                                                                                                                                                                        |
|------------------------------------------------|--------------------------------------------------------------------------------------------------------------------------------------------------------------------------------------------------------------------------------------------------------------------------------------------------------|--------|--------------------------------------------------------------------------------------------------------------------------------------------------------------------------------------------------------------------------------------------------------------------------------------------------------------------------------------------------------------------------------------------------------------------------------------------------------------------------------------------------------------------------------------------------------------------------------------------------------------------------------------------------------------------------------------------------------------------------------------------------------------------------------------------------------|
|                                                |                                                                                                                                                                                                                                                                                                        |        | "untreated cholera death" stocks. The "severe infected population" is assumed to be 0 initially.                                                                                                                                                                                                                                                                                                                                                                                                                                                                                                                                                                                                                                                                                                       |
| <b>smoothed_fraction_of_contaminated_water</b> | (SMTH3(total_bacteria_shedding_from_the_fraction_of_infected,time_to_affect_water_in_aquifers)*effect_of_sanitary_on_contaminated_water)                                                                                                                                                               | 1      | <p>The "smoothed fraction of contaminated water" smoothes the (third order) effect of the fraction of infected on the fraction of contaminated water with a delay of 14 days. This structure is referring to cholera model by Pruyt [9]. A third order delay is used to account for the fact that there are many stages in the process between bacteria shedding by the infected individuals to contaminating the water [17].</p> <p>Igbinosa et al. [8] found that South Africa has been plagued by outbreaks of Vibrio-related waterborne infections that are suspected to be linked to inefficiently treated effluents discharge from wastewater treatment facilities (cited from Okoh et al. [8]).</p> <p>Effluent is sewage that has been treated in a septic tank or sewage treatment plant.</p> |
| <b>susceptible_population(t)</b>               | susceptible_population (t - dt) + (immunity_waning_unreated_population + vaccination_acquired_immunity_waning + immunity_waning_treated_population + asymptomatic_infection_acquired_immunity_waning + stop_receiving_clean_water - infections - vaccination_susceptible - receiving_clean_water) * dt | person | Total population in Al Hudaydah governorate, Yemen in 2017 was 3,238,199 [15]. For models that simulate an outbreak within a short period of time (e.g. two years in this model), one can ignore the dynamics of population growth (birth rate and death rate, gray arrows) and assume a constant population. It is assumed the total population as susceptible to cholera as the first cholera case only reported in September 2016.                                                                                                                                                                                                                                                                                                                                                                  |
| <b>"time_IDPs_increase_to_Al-hudaydah"</b>     | 540                                                                                                                                                                                                                                                                                                    | day    | The conflict in Al-Hudaydah intensified from June 2018. Hence, the starting day is 540,000. Although IDP present in Al-Hudaydah even before June 2018, the impact from IDP is less compared to the drastic increase of IDP from June 2018. Hence, only IDP from June 2018 is captured in the model.                                                                                                                                                                                                                                                                                                                                                                                                                                                                                                    |
| <b>time_progress_to_next_stage</b>             | 1                                                                                                                                                                                                                                                                                                      | day    | The incubation period of cholera can range from several hours to 5 days [3,4,7]. Similar to the "average incubation time", "time to progress to next stage" uses 1 day as the symptomatic individuals will then progress to either mild or severe disease stage.                                                                                                                                                                                                                                                                                                                                                                                                                                                                                                                                       |

|                                                              |                                                                                                                                                                                             |        |                                                                                                                                                                                                                                                                                                                                                                                                                                                                                                                                                                                |
|--------------------------------------------------------------|---------------------------------------------------------------------------------------------------------------------------------------------------------------------------------------------|--------|--------------------------------------------------------------------------------------------------------------------------------------------------------------------------------------------------------------------------------------------------------------------------------------------------------------------------------------------------------------------------------------------------------------------------------------------------------------------------------------------------------------------------------------------------------------------------------|
| <b>time_to_affect_water_in_aquifers</b>                      | 3                                                                                                                                                                                           | day    | The "time to affect water in aquifers" has an assumptive value of 5 days delayed. According to Nevondo and Cloete [8], survival of vibrios in the aquatic environment relates sharply to various chemical, biological and physical characteristics of the aquatic milieu, with V. cholerae known to remain viable in surface waters for periods ranging from 1 h to 13 days (cited from Okoh et al. [8]).                                                                                                                                                                      |
| <b>total_asymptomatic_shedding</b>                           | $(\text{recently\_infected\_population} + \text{asymptomatic\_population}) * \text{bacteria\_shedding\_from\_asymptomatic}$                                                                 | person | "total asymptomatic shedding" is the total bacteria shed by number of asymptomatic population and recently infected population                                                                                                                                                                                                                                                                                                                                                                                                                                                 |
| <b>total_bacteria_shedding_from_the_fraction_of_infected</b> | $(\text{total\_asymptomatic\_shedding} + \text{total\_mildly\_shedding} + \text{total\_severe\_infected\_not\_in\_DTC\_shedding}) / \text{Total\_Population}$                               | 1      | <p>"fraction of infected" is the fraction of infected individuals who are contributing to the concentration of V. cholerae in the environment. This is a product of the number of infected individuals and the bacteria shedding in the stool over the total population. This compound parameter is depending on severity of infection as the bacteria shedding is different [7].</p> <p>Okoh et al. claimed that V. cholera presence in wastewater, therefore, could be dependent on the number of infected people in the population contributing to the wastewater flow.</p> |
| <b>total_mildly_shedding</b>                                 | $(\text{mildly\_infected\_population} + \text{untreated\_mildly\_infected\_population} + \text{treated\_mildly\_infected\_population}) * \text{bacteria\_shedding\_from\_mildly\_infected}$ | person | "total mildly shedding" is the total bacteria shed by number of treated mildly infected, mildly infected and untreated mildly infected population.                                                                                                                                                                                                                                                                                                                                                                                                                             |
| <b>total_severe_infected_not_in_DTC_shedding</b>             | $(\text{severe\_infected\_population} + \text{untreated\_severe\_infected\_population}) * \text{bacteria\_shedding\_from\_severely\_infected}$                                              | person | Severity affects the intensity of shedding, and so the average contribution of an infectious person to transmission may change systematically with time as the distribution of infectious doses changes [3,7]. The "severe infected not in DTC" excludes treated severe infected population because at DTC, the sewage system is in place with disinfection. Hence, it is assumed that all patients at DTC do not attribute their bacteria shedding back into the environment.                                                                                                 |
| <b>total_symptomatic_bacteria_shedding</b>                   | $\text{total\_mildly\_shedding} + \text{total\_severe\_infected\_not\_in\_DTC\_shedding}$                                                                                                   | person | "total symptomatic bacteria shedding" is a product of both mild and severely infected bacteria shedding.                                                                                                                                                                                                                                                                                                                                                                                                                                                                       |
| <b>treated_cholera_death(t)</b>                              | $\text{treated\_cholera\_death}(t - dt) + (\text{treated\_death}) * dt$                                                                                                                     | person | "treated cholera death" are the deaths result from severe infected individuals who have received treatment.                                                                                                                                                                                                                                                                                                                                                                                                                                                                    |

|                                              |                                                                                                                                                                                                                           |             |                                                                                                                                                                                                                                                                                                                                                                                                                                                                                                                                                                                                                                                                                                                                                                                                                                                                                                                                                                                                                                                                                                                                                                                                                                                                                                        |
|----------------------------------------------|---------------------------------------------------------------------------------------------------------------------------------------------------------------------------------------------------------------------------|-------------|--------------------------------------------------------------------------------------------------------------------------------------------------------------------------------------------------------------------------------------------------------------------------------------------------------------------------------------------------------------------------------------------------------------------------------------------------------------------------------------------------------------------------------------------------------------------------------------------------------------------------------------------------------------------------------------------------------------------------------------------------------------------------------------------------------------------------------------------------------------------------------------------------------------------------------------------------------------------------------------------------------------------------------------------------------------------------------------------------------------------------------------------------------------------------------------------------------------------------------------------------------------------------------------------------------|
| <b>treated_death</b>                         | $\text{treated\_severe\_infected\_population} * \text{fatality\_fraction} / \text{average\_duration\_of\_illness\_symptomatic}$                                                                                           | person /day | "treated deaths" flow is the rate at which severe infected individuals leave the stock through multiplication with the treated fatality fraction after an average duration of illness symptomatic of 9 days (material delay).                                                                                                                                                                                                                                                                                                                                                                                                                                                                                                                                                                                                                                                                                                                                                                                                                                                                                                                                                                                                                                                                          |
| <b>treated_mild_become_severe_infected</b>   | $\text{treated\_mildly\_infected\_population} * \text{indicated\_ratio\_of\_severe\_disease} / \text{time\_progress\_to\_next\_stage}$                                                                                    | person /day | "treated mild become severe infected" flow is the rate at which treated mildly infected individuals leave the stock after the time to progress to next stage - 1 day (material delay) into treated severe infected population. The flow depends on the indicated ratio of severe disease which is lower if the capacity of the ORC is not strained. The ORC aims to treat mildly infected individuals at an early stage as a prevention from deteriorating into severe infected stage. The strained ORC will affect the quality of treatment among the mildly infected individuals where the rate "treated mild become severe infected" is higher. Médecins Sans Frontières [4] reports that the initial clinical state can rapidly deteriorate (or not improve) if: – the volume of fluid prescribed on admission is insufficient: degree of dehydration underestimated or error in calculation. The volume is not administered within the correct time frame: rehydration too slow or too fast, interruptions in treatment (empty IV bags or ORS cups). On-going fluid losses (continued diarrhoea) are not adequately compensated by additional ORS or RL. Frequent vomiting persists: IV therapy may be needed for those who systematically vomit all ORS, even in patients with some dehydration. |
| <b>treated_mildly_infected_population(t)</b> | $\text{treated\_mildly\_infected\_population}(t - dt) + (\text{rehydration\_care} - \text{recovered\_from\_treated\_mild\_infection} - \text{treated\_mild\_become\_severe\_infected}) * dt$                              | person      | "treated mildly infected population" are mild cases of V. cholerae infection that are treated. Mildly infected individuals who shifted to the "treated mildly infected population" stock then leave after an average duration of illness symptomatic 9 days, and flow to "recovered immune treated population" and "treated severe infected population" stocks. The "treated mildly infected population" is assumed to be 0 initially.                                                                                                                                                                                                                                                                                                                                                                                                                                                                                                                                                                                                                                                                                                                                                                                                                                                                 |
| <b>treated_severe_infected_population(t)</b> | $\text{treated\_severe\_infected\_population}(t - dt) + (\text{emergency\_treatment} + \text{treated\_mild\_become\_severe\_infected} - \text{recovered\_from\_treated\_severe\_infection} - \text{treated\_death}) * dt$ | person      | "treated severe infected population" are severe cases of V. cholerae infection that are treated. Severe infected individuals who shifted to the "treated severe infected population" stock then leave after an average duration of illness symptomatic 9 days, and flow to "recovered immune treated population" and "treated cholera death" stocks. The "treated severe infected population" is assumed to be 0 initially.                                                                                                                                                                                                                                                                                                                                                                                                                                                                                                                                                                                                                                                                                                                                                                                                                                                                            |
| <b>untreated_cholera_death(t)</b>            | $\text{untreated\_cholera\_death}(t - dt) +$                                                                                                                                                                              | person      | "untreated cholera death" are the deaths result from severe infected individuals who left untreated.                                                                                                                                                                                                                                                                                                                                                                                                                                                                                                                                                                                                                                                                                                                                                                                                                                                                                                                                                                                                                                                                                                                                                                                                   |

|                                                |                                                                                                                                                                                                                    |              |                                                                                                                                                                                                                                                                                                                                                                                                                                                                                                                                                                                                                                                                                   |
|------------------------------------------------|--------------------------------------------------------------------------------------------------------------------------------------------------------------------------------------------------------------------|--------------|-----------------------------------------------------------------------------------------------------------------------------------------------------------------------------------------------------------------------------------------------------------------------------------------------------------------------------------------------------------------------------------------------------------------------------------------------------------------------------------------------------------------------------------------------------------------------------------------------------------------------------------------------------------------------------------|
|                                                | $(\text{untreated\_deaths}) * dt$                                                                                                                                                                                  |              |                                                                                                                                                                                                                                                                                                                                                                                                                                                                                                                                                                                                                                                                                   |
| <b>untreated_deaths</b>                        | $\text{untreated\_severe\_infected\_population} * \text{untreated\_fatality\_fraction} / \text{average\_duration\_of\_illness\_symptomatic}$                                                                       | person / day | "untreated deaths" flow is the rate at which severe infected individuals leave the stock through multiplication with the untreated fatality fraction after an average duration of illness symptomatic of 9 days (material delay).                                                                                                                                                                                                                                                                                                                                                                                                                                                 |
| <b>untreated_fatality_fraction</b>             | 0.01                                                                                                                                                                                                               | 1            | <p>Case fatality rate is 0.19% in 2017 in Al-hudaydah governorate [15]. "untreated fatality fraction" uses 0.004 assuming that the fatality fraction is higher than the case fatality rate with treated death fraction of 0.0021.</p> <p>McCrickard et al. [18] reports that more than half of the records of cholera deaths in Dar es Salaam were missing from the existing surveillance system, which only captured patients who arrived at DTCs. Deaths that occurred in other treatment locations or in the community were not reported. Underreporting of deaths during cholera epidemics, a phenomenon not unique to Tanzania poses a threat to global health security.</p> |
| <b>untreated_mildly_infected_population(t)</b> | $\text{untreated\_mildly\_infected\_population}(t - dt) + (\text{remain\_untreated\_mildly\_infected} - \text{recovered\_from\_untreated\_mild\_infection}) * dt$                                                  | person       | "untreated mildly infected population" are mild cases of V. cholerae infection that are not treated. Mildly infected individuals who shifted to the "untreated mildly infected population" stock then leave after an average duration of illness symptomatic 9 days, and flow to "recovered immune untreated population" stock. The "untreated mildly infected population" is assumed to be 0 initially.                                                                                                                                                                                                                                                                          |
| <b>untreated_severe_infected_population(t)</b> | $\text{untreated\_severe\_infected\_population}(t - dt) + (\text{remain\_untreated\_severe\_infected} - \text{recovered\_from\_untreated\_severe\_disease} - \text{untreated\_deaths}) * dt$                       | person       | "untreated severe infected population" are severe cases of V. cholerae infection that are not treated. Severe infected individuals who shifted to the "untreated severe infected population" stock then leave after an average duration of illness symptomatic 9 days, and flow to "recovered immune untreated population" stock. The "untreated severe infected population" is assumed to be 0 initially.                                                                                                                                                                                                                                                                        |
| <b>vaccinated_population(t)</b>                | $\text{vaccinated\_population}(t - dt) + (\text{vaccination\_susceptible} + \text{vaccination\_recovered\_asymptomatic} + \text{vaccination\_asymptomatic} - \text{vaccination\_acquired\_immunity\_waning}) * dt$ | person       | "vaccinated population" has the vaccinated individuals from recovered asymptomatic population, asymptomatic population, and susceptible population. Since there is no mass screening to filter the individuals with infection acquired immunity, it is assumed that the health workers vaccinate those who seemed healthy and never been treated for cholera the past 1 year.                                                                                                                                                                                                                                                                                                     |

|                                                 |                                                                                                                                                                                                  |               |                                                                                                                                                                                                                                                                                                                                                                                                                                |
|-------------------------------------------------|--------------------------------------------------------------------------------------------------------------------------------------------------------------------------------------------------|---------------|--------------------------------------------------------------------------------------------------------------------------------------------------------------------------------------------------------------------------------------------------------------------------------------------------------------------------------------------------------------------------------------------------------------------------------|
| <b>vaccination_acquired_immunity_waning</b>     | vaccinated_population//average_duration_of_protection                                                                                                                                            | person/day    | All vaccinated individuals leave vaccinated population stock after an average duration of protection (depending on 1 or 2 doses of vaccines) and flow as "vaccination acquired immunity waning" back to the susceptible population.                                                                                                                                                                                            |
| <b>vaccination_asymptomatic</b>                 | asymptomatic_population*indicated_fractional_vaccination                                                                                                                                         | person/day    | "vaccination asymptomatic" flow is the rate at which asymptomatic individuals leave the stock through multiplication with indicated fractional vaccination.                                                                                                                                                                                                                                                                    |
| <b>vaccination_recently_infected_population</b> | recently_infected_population*indicated_fractional_vaccination                                                                                                                                    | person/day    | Vaccination on recently infected population is assumed to be no impact. Hence, the flow is not attached to any stock. This is used                                                                                                                                                                                                                                                                                             |
| <b>vaccination_recovered_asymptomatic</b>       | recovered_asymptomatic_population*indicated_fractional_vaccination                                                                                                                               | person/day    | "vaccination recovered asymptomatic" flow is the rate at which recovered asymptomatic individuals leave the stock through multiplication with indicated fractional vaccination.                                                                                                                                                                                                                                                |
| <b>Health_sector:</b>                           |                                                                                                                                                                                                  |               |                                                                                                                                                                                                                                                                                                                                                                                                                                |
| <b>beds</b>                                     | 50                                                                                                                                                                                               | person/centre | 2,531 beds were reported in 54 Diarrhoea treatment centres DTCs [19]. "beds" is assumed to have 50 patients capacity in each DTC. MSF [4] guideline shows that one DTC has the capacity from 50 to 200 beds.                                                                                                                                                                                                                   |
| <b>building_DTC_start_time</b>                  | 80                                                                                                                                                                                               | day           | "building DTC start time" is the day when DTC started to be built.                                                                                                                                                                                                                                                                                                                                                             |
| <b>building_ORC_start_time</b>                  | 90                                                                                                                                                                                               | day           | "building ORC start time" is the day when ORC started to be built.                                                                                                                                                                                                                                                                                                                                                             |
| <b>data_number_of_DTC</b>                       | 18                                                                                                                                                                                               | centre        | Emergency Operations Center [19] reported 18 functioning DTC. The population in Al-hudaydah was in need of 44 ORC.                                                                                                                                                                                                                                                                                                             |
| <b>data_number_of_ORC</b>                       | 144                                                                                                                                                                                              | centre        | Emergency Operations Center [19] (reported 142 functioning ORC. The population in Al-hudaydah was in need of 422 ORC.                                                                                                                                                                                                                                                                                                          |
| <b>desired_DTC_capacity</b>                     | IF switch_data_collection=0 THEN 0 ELSE (IF switch_DTC=1 THEN (0+STEP(data_number_of_DTC*beds, indicated_building_DTC_start_time)) ELSE IF switch_DTC=2 THEN (0+STEP(desired_number_of_DTC*beds, | person        | "desired DTC capacity" is adjusted according to the number of severely infected individuals from the cholera prevalence (simulation). The variable input is a graphical function that has included the intervention historical data in 2017. It can be changed to test the policy impacts when the switch is turned to 2. "desired DTC capacity" also includes the implementation limitation from the effect of new DTC added. |

|                              |                                                                                                                                                                                                                                                                                                |            |                                                                                                                                                                                                                                                                                                                                                                                                                                                                                                                                                                                                                                                                          |
|------------------------------|------------------------------------------------------------------------------------------------------------------------------------------------------------------------------------------------------------------------------------------------------------------------------------------------|------------|--------------------------------------------------------------------------------------------------------------------------------------------------------------------------------------------------------------------------------------------------------------------------------------------------------------------------------------------------------------------------------------------------------------------------------------------------------------------------------------------------------------------------------------------------------------------------------------------------------------------------------------------------------------------------|
|                              | indicated_building_DTC_start_time)) ELSE 0)                                                                                                                                                                                                                                                    |            |                                                                                                                                                                                                                                                                                                                                                                                                                                                                                                                                                                                                                                                                          |
| <b>desired_number_of_DTC</b> | 18                                                                                                                                                                                                                                                                                             | centre     | "desired number of DTC" is adjusted according to the number of severely infected individuals from the cholera prevalence (simulation). It can be changed to test the policy impacts when the switch is turned to 2.                                                                                                                                                                                                                                                                                                                                                                                                                                                      |
| <b>desired_number_of_ORC</b> | 144                                                                                                                                                                                                                                                                                            | centre     | "desired number of ORC" is adjusted according to the number of severely infected individuals from the cholera prevalence (simulation). It can be changed to test the policy impacts when the switch is turned to 2.                                                                                                                                                                                                                                                                                                                                                                                                                                                      |
| <b>desired_ORC_capacity</b>  | IF<br>switch_data_collection<br>=0 THEN 0 ELSE (IF<br>switch_ORC=1 THEN<br>(0+STEP(data_number_<br>of_ORC*patient_treated,<br>indicated_building_ORC_start_time))ELSE IF<br>switch_ORC=2 THEN<br>(0+STEP(desired_number_of_ORC*patient_treated,<br>indicated_building_ORC_start_time)) ELSE 0) | person     | "desired ORC capacity" is adjusted according to the number of symptomatic individuals from the cholera prevalence (simulation). The variable input is a graphical function that has included the intervention historical data in 2017. It can be changed to test the policy impacts when the switch is turned to 2. "desired ORC capacity" also includes the implementation limitation from the effect of new ORC added.                                                                                                                                                                                                                                                 |
| <b>DTC_capacity(t)</b>       | $DTC\_capacity(t - dt) + (DTC\_capacity\_building) * dt$                                                                                                                                                                                                                                       | person     | People who are severely dehydrated may need intravenous fluids and hospitalisation. In these cases, they should be admitted to a Diarrhoea Treatment Centre (DTC). Without treatment, the mortality rate can reach 50 per cent; with adequate care, it's less than 2 per cent [3,4,7]. A DTC is set up outside of the main hospital to prevent the spread of the disease and is fully autonomous. In open settings, with spread-out populations, treatment needs to be as close as possible to affected populations. "DTC capacity" expressed as number of severely infected individuals that can be treated at ORC in Al-hudaydah. The stock has an initial value of 0. |
| <b>DTC_capacity_building</b> | $(desired\_DTC\_capacity - DTC\_capacity) // time\_to\_build\_DTC$                                                                                                                                                                                                                             | person/day | "DTC capacity building" is a goal seeking function at which the current capacity to treat severely infected individuals is closing the gap with desired DTC capacity over the time to build DTC (first order delay).                                                                                                                                                                                                                                                                                                                                                                                                                                                     |
| <b>DTC_need</b>              | people_in_need_DTC//beds                                                                                                                                                                                                                                                                       | centre     | "DTC need" is a demand of beds relative to supply of beds ratio.                                                                                                                                                                                                                                                                                                                                                                                                                                                                                                                                                                                                         |

|                                                              |                                                                                                                                           |     |                                                                                                                                                                                                                                                                                                                                                                                                                                                                                                                                                                                                                                                                                                                                                                                                                                                                                                                                                                                                                     |
|--------------------------------------------------------------|-------------------------------------------------------------------------------------------------------------------------------------------|-----|---------------------------------------------------------------------------------------------------------------------------------------------------------------------------------------------------------------------------------------------------------------------------------------------------------------------------------------------------------------------------------------------------------------------------------------------------------------------------------------------------------------------------------------------------------------------------------------------------------------------------------------------------------------------------------------------------------------------------------------------------------------------------------------------------------------------------------------------------------------------------------------------------------------------------------------------------------------------------------------------------------------------|
| <b>DTC_strain</b>                                            | treated_severe_infected_population*ratio_severe_disease_in_DTC//DTC_capacity                                                              | 1   | Strain on DTC services capacity, level of overloading, from ratio of treated severe infected population to DTC capacity.                                                                                                                                                                                                                                                                                                                                                                                                                                                                                                                                                                                                                                                                                                                                                                                                                                                                                            |
| <b>effect_of_DTC_strain_on_seeking_emergency_treatment</b>   | GRAPH(DTC_strain)<br>Points(11): (0.000, 1.296), (0.500, 1.222), (1.000, 1.128), ...                                                      | 1   | The graphical function shows that when the DTC strain is high, it affects the health seeking behavior among the infected individuals. More data/expert input is required for this parameter.                                                                                                                                                                                                                                                                                                                                                                                                                                                                                                                                                                                                                                                                                                                                                                                                                        |
| <b>effect_of_ORC_strain_on_fraction_of_severe_disease</b>    | GRAPH(ORC_strain)<br>Points(18): (0.000, 0.503346425462), (0.0882352941176, 0.505994142063), (0.176470588235, 0.510691654066), ...        | 1   | By helping to reduce the severity of dehydration of patients who require health facility services, ORCs reduce stress and overcrowding at health facilities [20]. Besides, when mildly infected individuals receive early treatment, it can help prevent the symptoms deteriorates to severely infected stage that requires DTC treatment. Médecins Sans Frontières [4] also reports that the initial clinical state can rapidly deteriorate (or not improve) if: The volume of fluid prescribed on admission is insufficient (degree of dehydration underestimated or error in calculation). In addition, when the volume is not administered within the correct time frame (rehydration too slow or too fast, interruptions in treatment). In this model, the graphical function shows that when the ORC strain is high, it affects the quality and availability of care to mildly infected individuals. Hence, the ORC has less effect on preventing individuals flow into "treated severe infected population". |
| <b>effect_of_ORC_strain_on_people_seeking_hydration_care</b> | GRAPH(ORC_strain)<br>Points(11): (0.000, 1.296), (0.500, 1.222), (1.000, 1.128), ...                                                      | 1   | The graphical function shows that when the ORC strain is high, it affects the health seeking behavior among the infected individuals. More data/expert input is required for this parameter.                                                                                                                                                                                                                                                                                                                                                                                                                                                                                                                                                                                                                                                                                                                                                                                                                        |
| <b>fatality_fraction</b>                                     | service_strain_fatality_fraction+(treated_fatality_fraction-service_strain_fatality_fraction)/(1+DTC_strain^service_capacity_sensitivity) | 1   | According to Médecins Sans Frontières [4], the case fatality rate (CFR) is used for assessing the quality of healthcare services (case management) at treatment centres. The standard indicator for adequate case management is a CFR < 1%. In this model, the "fatality fraction" on treated death is affected by the strain on DTC services capacity. The formula includes the sensitivity of care quality to health services strain. The negative exponent indicates an inverse relationship, whereby an increase in health services strain leads to a decrease care quality. Hence, an increase in fatality fraction.                                                                                                                                                                                                                                                                                                                                                                                           |
| <b>indicated_building_DTC_start_time</b>                     | IF<br>switch_data_collection=2 THEN<br>building_DTC_start_time +<br>(response_time_to_update_system) ELSE                                 | day | "indicated building DTC start time" includes the delay from surveillance system.                                                                                                                                                                                                                                                                                                                                                                                                                                                                                                                                                                                                                                                                                                                                                                                                                                                                                                                                    |



|                                          |                                                                                                                                          |            |                                                                                                                                                                                                                                                                                                                                                                                                                                                                                                          |
|------------------------------------------|------------------------------------------------------------------------------------------------------------------------------------------|------------|----------------------------------------------------------------------------------------------------------------------------------------------------------------------------------------------------------------------------------------------------------------------------------------------------------------------------------------------------------------------------------------------------------------------------------------------------------------------------------------------------------|
|                                          | building_DTC_start_time                                                                                                                  |            |                                                                                                                                                                                                                                                                                                                                                                                                                                                                                                          |
| <b>indicated_building_ORC_start_time</b> | IF<br>switch_data_collection<br>=2 THEN<br>building_ORC_start_time +<br>(response_time_to_update_system) ELSE<br>building_ORC_start_time | day        | "indicated building ORC start time" includes the delay from surveillance system.                                                                                                                                                                                                                                                                                                                                                                                                                         |
| <b>initial_DTC_capacity</b>              | 50                                                                                                                                       | person     | The initial DTC is assumed to be 50 persons. This is an assumption as the cholera cases were reported since September 2016.                                                                                                                                                                                                                                                                                                                                                                              |
| <b>initial_ORC_capacity</b>              | 200                                                                                                                                      | person     | The initial ORC is assumed to be 200 persons. This is an assumption as the cholera cases were reported since September 2016.                                                                                                                                                                                                                                                                                                                                                                             |
| <b>ORC_capacity(t)</b>                   | $ORC\_capacity(t - dt) + (ORC\_capacity\_building) * dt$                                                                                 | person     | Cholera is relatively simple to treat in people with mild to moderate forms usually able to recover through treatment with fluids and oral rehydration salts, which are easy to administer [3,4,7]. Care is decentralised to smaller-scale Oral Rehydration Centres (ORCs) known as cholera treatment units and oral rehydration solution points, supported by mobile teams."ORC capacity" expressed as number of people that can be treated at ORC in Al-hudaydah. The stock has an initial value of 0. |
| <b>ORC_capacity_building</b>             | $(desired\_ORC\_capacity - ORC\_capacity) // time\_to\_build\_ORC$                                                                       | person/day | "ORC capacity building" is a goal seeking function at which the current capacity to treat mildly infected individuals is closing the gap with desired ORC capacity over the time to build ORC (first order delay).                                                                                                                                                                                                                                                                                       |
| <b>ORC_need</b>                          | $(people\_in\_need\_ORC) // patient\_treated$                                                                                            | centre     | "ORC need" is a demand of care relative to supply of care ratio.                                                                                                                                                                                                                                                                                                                                                                                                                                         |
| <b>ORC_strain</b>                        | $people\_in\_need\_ORC // ORC\_capacity$                                                                                                 | 1          | Strain on services capacity, level of overloading, from ratio of mildly and severely infected population to ORC capacity.                                                                                                                                                                                                                                                                                                                                                                                |
| <b>other_AWD_cases</b>                   | 7000                                                                                                                                     | person     | AWD case that is not easy to be differentiated from cholera patients. Most cases of acute, watery diarrhea are caused by viruses (viral gastroenteritis). The most common ones in children are rotavirus and in adults are norovirus (this is sometimes called "cruise ship diarrhea" due to well publicized epidemics) [21]. This is an assumption number of 7000 persons. More data/expert input is required for this parameter.                                                                       |

|                                         |                                                                                                                                                                                |                |                                                                                                                                                                                                                                                                                             |
|-----------------------------------------|--------------------------------------------------------------------------------------------------------------------------------------------------------------------------------|----------------|---------------------------------------------------------------------------------------------------------------------------------------------------------------------------------------------------------------------------------------------------------------------------------------------|
| <b>patient_treated</b>                  | 50                                                                                                                                                                             | person /centre | Michas [22] reports majority physicians see 20 patients per day, only 1.3% of physicians saw between 51 and 60 patients per day. Assuming doctors in an emergency setting can see 50 patients. "patient tested" is assumed to be 50 patients per day.                                       |
| <b>people_in_need_DTC</b>               | $\text{treated\_severe\_infected\_population} \times \text{ratio\_severe\_disease\_in\_DTC}$                                                                                   | person         | "people in need DTC" is number of severely infected individuals who need DTC treatment. Some severely infected individuals can be treated at ORC.                                                                                                                                           |
| <b>people_in_need_ORC</b>               | $(\text{treated\_severe\_infected\_population} \times (1 - \text{ratio\_severe\_disease\_in\_DTC})) + \text{treated\_mildly\_infected\_population} + \text{other\_AWD\_cases}$ | person         | "people in need DTC" is number of mildly infected individuals who need ORC treatment. This include other AWD case that is not easy to be differentiated from cholera patients.                                                                                                              |
| <b>ratio_severe_disease_in_DTC</b>      | 0.7                                                                                                                                                                            | 1              | Some severely infected individuals can be treated at ORC while some of them require treatment at DTC. It is assumed that 0.2 of all severely infected individuals need treatment at DTC.                                                                                                    |
| <b>service_capacity_sensitivity</b>     | 2                                                                                                                                                                              | 1              | "service capacity sensitivity" indicates the sensitivity of care quality to health services strain.                                                                                                                                                                                         |
| <b>service_strain_fatality_fraction</b> | 0.01                                                                                                                                                                           | 1              | Case fatality rate is 0.19% in 2017 in Al-hudaydah governorate [15]. "treated fatality fraction" uses 0.004 assuming that the fatality fraction is higher than the case fatality rate with treated death fraction of 0.0019 when minimally treated due to overwhelmed, chaotic health care. |
| <b>switch_DTC</b>                       | 1                                                                                                                                                                              | 1              | A switch to activate and deactivate the intervention                                                                                                                                                                                                                                        |
| <b>switch_ORC</b>                       | 1                                                                                                                                                                              | 1              | A switch to activate and deactivate the intervention                                                                                                                                                                                                                                        |
| <b>time_to_build_DTC</b>                | 120                                                                                                                                                                            | day            | "time to build DTC" is an assumptive duration (days) needed to increase the current capacity to meet the need from "desired DTC capacity".                                                                                                                                                  |
| <b>time_to_build_ORC</b>                | 30                                                                                                                                                                             | day            | "time to build ORC" is an assumptive duration (days) needed to increase the current capacity to meet the need from "desired ORC capacity".                                                                                                                                                  |
| <b>treated_fatality_fraction</b>        | 0.0021                                                                                                                                                                         | 1              | Case fatality rate is 0.21% in 2017 in Al-hudaydah governorate [15]. "treated fatality fraction" uses 0.001 assuming that the fatality fraction is lower than the case fatality rate with treated death fraction of 0.0019 when the quality of healthcare services is good.                 |

**National\_cholera\_surveillance\_system:**

|                                                                  |                                                                                                                                                                                                                                                                                      |            |                                                                                                                                                                                                                                                                                                                                                                                                                                                                                                                                                                                                                                                                                                                                                                                                                                 |
|------------------------------------------------------------------|--------------------------------------------------------------------------------------------------------------------------------------------------------------------------------------------------------------------------------------------------------------------------------------|------------|---------------------------------------------------------------------------------------------------------------------------------------------------------------------------------------------------------------------------------------------------------------------------------------------------------------------------------------------------------------------------------------------------------------------------------------------------------------------------------------------------------------------------------------------------------------------------------------------------------------------------------------------------------------------------------------------------------------------------------------------------------------------------------------------------------------------------------|
| <b>data_updated_in_cholera_surveillance_system</b>               | IF<br>switch_data_collection<br>=2 THEN<br>SMTH3("recorded_suspected_and_confirmed_cases_(cummulative)",<br>normal_time_to_update_system+response_time_to_update_system)<br>) ELSE<br>SMTH3("recorded_suspected_and_confirmed_cases_(cummulative)",<br>normal_time_to_update_system) | person     |                                                                                                                                                                                                                                                                                                                                                                                                                                                                                                                                                                                                                                                                                                                                                                                                                                 |
| <b>including_unreported(t)</b>                                   | including_unreported(t - dt) +<br>(including_unreported_flow) * dt                                                                                                                                                                                                                   | person     | "including unreported" is the stock of all infected individuals.                                                                                                                                                                                                                                                                                                                                                                                                                                                                                                                                                                                                                                                                                                                                                                |
| <b>including_unreported_flow</b>                                 | asymptomatic+mildly_infected*0.8                                                                                                                                                                                                                                                     | person/day | "including unreported flow" is the rate of all infected individuals in the model per day.                                                                                                                                                                                                                                                                                                                                                                                                                                                                                                                                                                                                                                                                                                                                       |
| <b>normal_time_to_update_system</b>                              | 14                                                                                                                                                                                                                                                                                   | day        | "normal time to update system" is a desired duration (days) needed to collect and update data of the surveillance system.                                                                                                                                                                                                                                                                                                                                                                                                                                                                                                                                                                                                                                                                                                       |
| <b>"recorded_suspected_and_confirmed_cases_(cummulative)"(t)</b> | "recorded_suspected_and_confirmed_cases_(cummulative)"(t - dt) +<br>("recorded_suspected_and_confirmed_cases_(rate)") * dt                                                                                                                                                           | person     | In areas where an epidemic is under way, a suspected case of cholera is defined as acute watery diarrhea, with or without vomiting, in a patient over 5 years of age. According the study by Camacho [11], Yemen Health Authorities set up a national cholera surveillance system to collect information on suspected cholera cases presenting at health facilities (no mass screening, the data depends on the availability of ORC, DTC, and health seeking ratio). Individual variables included symptom onset date, age, severity of dehydration, and rapid diagnostic test result. Suspected cholera cases were confirmed by culture, and a subset of samples had additional phenotypic and genotypic analysis. "cumulative cholera cases (suspected and confirmed cases)" is a stock with recorded cases from ORC and DTC. |
| <b>"recorded_suspected_and_confirmed_cases_(rate)"</b>           | rehydration_care+emergency_treatment                                                                                                                                                                                                                                                 | person/day | According the study by Camacho [11], Yemen Health Authorities set up a national cholera surveillance system to collect information on suspected cholera cases presenting at health facilities. Individual variables included symptom onset date, age, severity of dehydration, and rapid diagnostic test result. Suspected cholera cases were confirmed by culture, and a subset of samples had additional phenotypic and genotypic analysis. "recorded                                                                                                                                                                                                                                                                                                                                                                         |

|                                          |                                                                                                                                                                                                   |                |                                                                                                                                                                                                                                                     |
|------------------------------------------|---------------------------------------------------------------------------------------------------------------------------------------------------------------------------------------------------|----------------|-----------------------------------------------------------------------------------------------------------------------------------------------------------------------------------------------------------------------------------------------------|
|                                          |                                                                                                                                                                                                   |                | cholera cases" flow is the rate of individuals seeking treatment at ORC and DTC.                                                                                                                                                                    |
| <b>response_time_to_update_system</b>    | 0                                                                                                                                                                                                 | day            | "normal time to update system" is an assumptive duration (days) needed to collect and update data of the surveillance system.                                                                                                                       |
| <b>switch_data_collection</b>            | 1                                                                                                                                                                                                 | 1              | A switch to activate and deactivate the intervention                                                                                                                                                                                                |
| <b>Sanitation_condition:</b>             |                                                                                                                                                                                                   |                |                                                                                                                                                                                                                                                     |
| <b>added_latrine_capacity(t)</b>         | $\text{added\_latrine\_capacity}(t - dt) + (\text{latrine\_construction}) * dt$                                                                                                                   | person         | "added latrine capacity" is expressed as number of people that can be provided with latrine facility.                                                                                                                                               |
| <b>average_sewered_population</b>        | $\text{Total\_Population} * \text{ratio\_sewered\_population}$                                                                                                                                    | person         | "average sewer population" is the product of total population multiply with ratio sewer population.                                                                                                                                                 |
| <b>building_capacity_to_do_treatment</b> | $((\text{desired\_sewage\_plant\_treatment\_capacity\_to\_treat\_sewage\_plant}) / \text{time\_to\_increase\_treatment\_capacity}) * \text{effect\_of\_maximum\_support\_on\_building\_capacity}$ | person/day/day | "building capacity to do treatment" is a goal seeking function at which the current capacity to treat sewage plant is closing the gap with desired desired sewage plant treatment over the time to increase treatment capacity (first order delay). |
| <b>building_latrine_start_time</b>       | 0                                                                                                                                                                                                 | day            | "building latrine start time" is the day when latrines started to be built.                                                                                                                                                                         |
| <b>capacity_to_treat_sewage_plant(t)</b> | $\text{capacity\_to\_treat\_sewage\_plant}(t - dt) + (\text{building\_capacity\_to\_do\_treatment}) * dt$                                                                                         | person/day     | Taking into the implementation challenges such as delay in building capacity in treating and maintaining sewage plants, "capacity to treat sewage plant" expressed as number of people that can be covered by the treated sewage plant.             |
| <b>current_max_latrine_need</b>          | $\text{Total\_Population} * \text{current\_ratio\_open\_defecation}$                                                                                                                              | person         | "current max latrine need" is the maximum capacity reduces with the additional capacity (and likewise) overtime.                                                                                                                                    |
| <b>current_ratio_open_defecation</b>     | $\text{ratio\_open\_defecation} - (\text{added\_latrine\_capacity} / \text{Total\_Population})$                                                                                                   | 1              | Ratio of people practicing open defecation in urban area of Yemen after the intervention.                                                                                                                                                           |

|                                            |                                                                                                                                                                                                        |            |                                                                                                                                                                                                                                                                                                                                                                   |
|--------------------------------------------|--------------------------------------------------------------------------------------------------------------------------------------------------------------------------------------------------------|------------|-------------------------------------------------------------------------------------------------------------------------------------------------------------------------------------------------------------------------------------------------------------------------------------------------------------------------------------------------------------------|
| <b>data_sewage_treatment_plant_support</b> | GRAPH(TIME)<br>Points(728): (0.0, 0), (1.00412654746, 0), (2.00825309491, 0), ...                                                                                                                      | person/day | <p>— data sewage treatment plant support</p>                                                                                                                                                                                                                                                                                                                      |
| <b>degradation</b>                         | sewage_treatment_plant_supported/degradation_time                                                                                                                                                      | person/day | "degradation' flow is the rate that describes how quickly the sewage treatment plant are in need of treatment and maintenance again.                                                                                                                                                                                                                              |
| <b>degradation_time</b>                    | 30                                                                                                                                                                                                     | day        | "degradation time" is assumed to be 30 days, assuming a sewage treatment plant needs maintenance after 30 days. More data/expert input is required for this parameter.                                                                                                                                                                                            |
| <b>desired_latrine_construction</b>        | IF switch_data_collection=0 THEN 0 ELSE ( IF switch_latrine=2 THEN STEP(desired_number_of_new_latrine, indicated_building_latrine_start_time)*people_per_latrine*effect_of_maximum_new_latrine ELSE 0) | person     | Once the switch is changed to value 2, "desired latrine construction" has a pulse function of the product of desired number of new latrine, people per latrine, and building latrine start time. It also includes the effect of maximum new latrine as the implementation limitation.                                                                             |
| <b>desired_number_of_new_latrine</b>       | 0                                                                                                                                                                                                      | latrine    | "desired number of new latrine" is adjusted according to the maximum new latrine capacity needed. It can be changed to test the policy impacts when the switch is turned to 2.                                                                                                                                                                                    |
| <b>desired_sewage_plant_treatment</b>      | GRAPH(IF switch_data_collection=2 THEN TIME + (response_time_to_update_system) ELSE TIME) Points(730): (0.0, 0), (1.00137174211, 0), (2.00274348422, 0), ...                                           | person/day | "desired sewage plant treatment" is adjusted according to the number of individuals covered by treated sewage plant. The variable input is a graphical function that has included the intervention historical data in 2017. It can be changed to test the policy impacts. The intervention start time include response time (delay) from the surveillance system. |
| <b>effect_from_latrine_intervention</b>    | normal_sanitary_condition*weight_of_latrine_use*effect_of_addition                                                                                                                                     | 1          |                                                                                                                                                                                                                                                                                                                                                                   |

|                                                           |                                                                                                                            |   |                                                                                                                                                                                                                                                                                                                                                                                                                                                                                                                                                        |
|-----------------------------------------------------------|----------------------------------------------------------------------------------------------------------------------------|---|--------------------------------------------------------------------------------------------------------------------------------------------------------------------------------------------------------------------------------------------------------------------------------------------------------------------------------------------------------------------------------------------------------------------------------------------------------------------------------------------------------------------------------------------------------|
|                                                           | nal_latrine_on_sanitary_condition                                                                                          |   |                                                                                                                                                                                                                                                                                                                                                                                                                                                                                                                                                        |
| <b>effect_from_other_infrastructure_conditions</b>        | normal_sanitary_condition*weight_of_other_sanitary_interventions*Other_infrastructure_states                               | 1 |                                                                                                                                                                                                                                                                                                                                                                                                                                                                                                                                                        |
| <b>effect_from_sewage_plant_intervention</b>              | normal_sanitary_condition*weight_of_sewage_plant_support*effect_of_sewage_plant_treatment_on_sanitary_condition            | 1 |                                                                                                                                                                                                                                                                                                                                                                                                                                                                                                                                                        |
| <b>effect_of_additional_latrine_on_sanitary_condition</b> | GRAPH(latrine_need) Points(20): (0.000, 2.000), (0.0526315789474, 1.978), (0.105263157895, 1.949), ...                     | 1 | Latrine intervention includes additional latrine and maintenance during the epidemic. The "effect of additional latrine on sanitary condition" has a graphical function of S-shape decay. When the latrine need is value 1 (no intervention), the effect is 1 (no effect to the normal sanitary condition). The maximum effect is limited at 2 in order to constrain the sanitary condition at its maximum at 100%.                                                                                                                                    |
| <b>effect_of_maximum_new_latrine</b>                      | GRAPH(latrine_need) Points(11): (0.0000, 0.000), (0.0300, 0.237185670755), (0.0600, 0.423017710815), ...                   | 1 | The "effect of maximum new latrine" has a graphical function of logarithmic growth. Assuming that when the latrine need is closer to 0, the effect decreases increasingly towards 0 because there is a lack of need to add more latrine.                                                                                                                                                                                                                                                                                                               |
| <b>effect_of_maximum_support_on_building_capacity</b>     | GRAPH(sewage_treatment_plant_need) Points(11): (0.0000, 0.000), (0.0300, 0.212119217174), (0.0600, 0.385094456986), ...    | 1 | The "effect of maximum support on building capacity" has a graphical function of logarithmic growth. Assuming that when the sewage treatment plant need is closer to 0, the effect decreases increasingly towards 0 because there is a lack of need to support the sewage plant treatment.                                                                                                                                                                                                                                                             |
| <b>effect_of_sanitary_on_contaminated_water</b>           | GRAPH(indicated_sanitary_conditions) Points(13): (0.000, 0.7503), (0.0833333333333, 0.7144), (0.166666666667, 0.6755), ... | 1 | "effect of sanitary on contaminated water" represents the sanitation states that impact the population in accessing clean water. When the indicated sanitary conditions is close to 1, from the range of 0 to 1, (poor to good sanitary condition), the effect (values) on the contaminated water decreases decreasingly towards zero: It reduces the water contamination level. The maximum effect (minimum value) is limited at 0.2 as good infrastructure cannot promise 0 water contamination. There are other factors on the water contamination. |

|                                                               |                                                                                                                                   |            |                                                                                                                                                                                                                                                                                                                                                                                                                                                                                                                                                                                                                                                                                                                                                    |
|---------------------------------------------------------------|-----------------------------------------------------------------------------------------------------------------------------------|------------|----------------------------------------------------------------------------------------------------------------------------------------------------------------------------------------------------------------------------------------------------------------------------------------------------------------------------------------------------------------------------------------------------------------------------------------------------------------------------------------------------------------------------------------------------------------------------------------------------------------------------------------------------------------------------------------------------------------------------------------------------|
| <b>effect_of_sewage_plant_treatment_on_sanitary_condition</b> | GRAPH(sewage_treatment_plant_need)<br>Points(20): (0.000, 2.000), (0.0526315789474, 1.967), (0.105263157895, 1.929), ...          | 1          | Sewage plant support intervention includes additional treatment and maintenance to the sewage plants during the epidemic. Hence, this is additional treatment to the usual maintenance routines in the governorate. The "effect of sewage plant treatment on sanitary condition" has a graphical function of S-shape decay. When the sewage treatment plant need is value 1 (no intervention), the effect is 1 (no effect to the normal sanitary condition). The maximum effect is limited at 2 in order to constrain the sanitary condition at its maximum at 100%.                                                                                                                                                                               |
| <b>indicated_building_latrine_start_time</b>                  | IF switch_data_collection =2 THEN building_latrine_start_time + (response_time_to_update_system) ELSE building_latrine_start_time | day        | "building latrine start time" includes the delay from surveillance system.                                                                                                                                                                                                                                                                                                                                                                                                                                                                                                                                                                                                                                                                         |
| <b>indicated_sanitary_conditions</b>                          | effect_from_sewage_plant_intervention+effect_from_other_infrastructure_conditions+effect_from_latrine_intervention                | 1          | "indicated sanitary conditions" represents the sanitation states that impact the population in accessing clean water. It multiplies the effect of sewage plant treatment on sanitary, effect of additional latrine on sanitary condition, and effect of other infrastructure states on the indicated sanitary conditions. Most of Yemen's major water and sanitation systems have sustained damage, and refuse collection services have been severely impaired. That there has not been a complete collapse is down to the resourcefulness of the population. "In some of the large cities, it is the business community that has come together, raised funds, and arranged solid waste collection campaigns that have been very successful" [23]. |
| <b>initial_latrine_capacity_needed</b>                        | (Total_Population*ratio_open_defecation)                                                                                          | person     | "initial latrine capacity needed" is the initial need of latrine capacity by looking at the current number of population who are openly defecating.                                                                                                                                                                                                                                                                                                                                                                                                                                                                                                                                                                                                |
| <b>latrine_construction</b>                                   | MAX((desired_latrine_construction-added_latrine_capacity)/time_to_build_latrine, 0)                                               | person/day | "latrine construction" is a goal seeking function at which the added latrine capacity is closing the gap with desired latrine construction over the time to build latrine (first order delay).                                                                                                                                                                                                                                                                                                                                                                                                                                                                                                                                                     |
| <b>latrine_need</b>                                           | current_max_latrine_need/INIT(current_max_latrine_need)                                                                           | 1          | "latrine need" is the current ratio open defecation relative to the initial ratio open defecation. If the value is 1, it indicates 100% need. If there is intervention, the need of latrine reduces, causes the value to be less than 1; hence, a reduced need and an effect of intervention on sanitary conditions.                                                                                                                                                                                                                                                                                                                                                                                                                               |

|                                      |                                                                 |                  |                                                                                                                                                                                                                                                                                                                                                                                                                                                                                                                                                                                                                              |
|--------------------------------------|-----------------------------------------------------------------|------------------|------------------------------------------------------------------------------------------------------------------------------------------------------------------------------------------------------------------------------------------------------------------------------------------------------------------------------------------------------------------------------------------------------------------------------------------------------------------------------------------------------------------------------------------------------------------------------------------------------------------------------|
| <b>normal_sanitary_condition</b>     | 0.5                                                             | 1                | Under conflict affected context, the value of "normal sanitary condition" is assumed to be 0.5 functioning. According to WHO–UNICEF statistics, in 2014 only 53% of the population used improved sanitation facilities (cited from [14]).                                                                                                                                                                                                                                                                                                                                                                                    |
| <b>number_of_latrine_constructed</b> | added_latrine_capacity / people_per_latrine                     | latrine          | "number of latrine constructed" is obtained from dividing added latrine capacity with people per latrine.                                                                                                                                                                                                                                                                                                                                                                                                                                                                                                                    |
| <b>Other_infrastructure_states</b>   | 1                                                               | 1                | "Other infrastructure states" are represented by household and personal level sanitation that is different than community level interventions on sewage treatment plant and latrines. Under conflict affected context, the value of other infrastructures is assumed to be 0.5 functioning. Therefore, the value for this parameter is 1. No intervention means no effect to the normal sanitary condition. Personal and household sanitation conditions play an important role on fecal-oral cholera transmission that is not within the boundary of this model. Hence, it is represented as constant values in this model. |
| <b>people_per_latrine</b>            | 20                                                              | person / latrine | Gunther et al.'s [24] research findings recommend that not more than four households (or 20 individuals) should share a toilet stance to ensure long-term hygienic and sustainable use. MSF [4] and Spiegel et al. [13] also report a minimum of one latrine for 20 people. Hence, the value 20 is used for each latrine.                                                                                                                                                                                                                                                                                                    |
| <b>ratio_open_defecation</b>         | 0.01                                                            | 1                | Worldbank [25] reports 1% of people practicing open defecation in urban area of Yemen in 2017. Open defecation included cases where feces are disposed in fields, water, and other open spaces and unimproved sanitation includes disposing feces in latrines without a platform, hanging latrines, or bucket latrines.                                                                                                                                                                                                                                                                                                      |
| <b>ratio_sewered_population</b>      | 0.693                                                           | 1                | Average sewer population in Al-hudaydah is 69.3% [26].                                                                                                                                                                                                                                                                                                                                                                                                                                                                                                                                                                       |
| <b>sewage_treatment_plant(t)</b>     | sewage_treatment_plant(t - dt) + (degradation - treatment) * dt | person           | Sewage plant treatment removes contaminants from sewage to produce an effluent that is suitable for discharge to the surrounding environment or an intended reuse application. Non-functional sewage plants leads to contamination of the shallow aquifers and wells, where local civilians and private tankers collect drinking water. Sewage plant support intervention includes additional treatment and maintenance to the sewage plants during the epidemic [27]. Initial value of the stock is "average sewer population" in Al-hudaydah.                                                                              |



|                                               |                                                                                                                                                                                 |             |                                                                                                                                                                                                                                                                                                                                                                                                                            |
|-----------------------------------------------|---------------------------------------------------------------------------------------------------------------------------------------------------------------------------------|-------------|----------------------------------------------------------------------------------------------------------------------------------------------------------------------------------------------------------------------------------------------------------------------------------------------------------------------------------------------------------------------------------------------------------------------------|
| <b>sewage_treatment_plant_need</b>            | sewage_treatment_plant/INIT(sewage_treatment_plant)                                                                                                                             | 1           | "sewage treatment plant need" is the stock sewage plant treatment relative to the initial sewage plant treatment. If the value is 1, it indicates 100% need. If there is intervention, the stock reduces, causes the value to be less than 1; hence, a reduced need and an effect of intervention on sanitary conditions.                                                                                                  |
| <b>sewage_treatment_plant_supported(t)</b>    | sewage_treatment_plant_supported(t - dt) + (treatment - degradation) * dt                                                                                                       | person      | "sewage treatment plant supported" is the stock where the number of individuals covered by treatment and maintenance of the sewage plants.                                                                                                                                                                                                                                                                                 |
| <b>switch_latrine</b>                         | 0                                                                                                                                                                               | 1           | A switch to activate and deactivate the intervention                                                                                                                                                                                                                                                                                                                                                                       |
| <b>switch_treatment</b>                       | 1                                                                                                                                                                               | 1           | A switch to activate and deactivate the intervention                                                                                                                                                                                                                                                                                                                                                                       |
| <b>time_to_build_latrine</b>                  | 30                                                                                                                                                                              | day         | "time to build latrine" is an assumptive duration (days) needed to increase the current capacity to meet the need from "desired latrine construction".                                                                                                                                                                                                                                                                     |
| <b>time_to_increase_treatment_capacity</b>    | 14                                                                                                                                                                              | day         | "time to increase treatment capacity" is an assumptive duration (days) needed to increase the current capacity to meet the need from "sewage treatment plant". More data/expert input is required for this parameter.                                                                                                                                                                                                      |
| <b>treatment</b>                              | IF switch_data_collection =0 THEN 0 ELSE (IF switch_treatment=1 THEN data_sewage_treatment_plant_support ELSE IF switch_treatment=2 THEN capacity_to_treat_sewage_plant ELSE 0) | person /day | Sewage treatment is a type of wastewater treatment which aims to remove contaminants from sewage to produce an effluent that is suitable for discharge to the surrounding environment or an intended reuse application, thereby preventing water pollution from raw sewage discharges. "treatment" flow is the rate at which individuals who leave sewage treatment plant stock to sewage treatment plant supported stock. |
| <b>weight_of_latrine_use</b>                  | 0.15                                                                                                                                                                            | 1           | "weight of latrine use" assigns the weight of latrine state in influencing the indicated sanitary condition. It is assumed to be 0.2 of the sanitary condition as open defecation can lead to contamination of the shallow aquifers and wells. Hence, the effect of functioning latrine intervention is assumed to be 0.2. More data/expert input is required for this parameter.                                          |
| <b>weight_of_other_sanitary_interventions</b> | 0.45                                                                                                                                                                            | 1           | "weight of other sanitary interventions" assigns the weight of other sanitation state in influencing the indicated sanitary condition. It is assumed to be 0.45 because this parameter sanitary conditions include household and personal level sanitation that is different than community level interventions on sewage treatment plant and                                                                              |

|                                       |       |                |                                                                                                                                                                                                                                                                                                                                                                                                                                                                                                                                                                                                                                                                                                                      |
|---------------------------------------|-------|----------------|----------------------------------------------------------------------------------------------------------------------------------------------------------------------------------------------------------------------------------------------------------------------------------------------------------------------------------------------------------------------------------------------------------------------------------------------------------------------------------------------------------------------------------------------------------------------------------------------------------------------------------------------------------------------------------------------------------------------|
|                                       |       |                | latrines. Although personal and household sanitation conditions play an important role on fecal-oral cholera direct transmission, this is not within the boundary of this model.                                                                                                                                                                                                                                                                                                                                                                                                                                                                                                                                     |
| <b>weight_of_sewage_plant_support</b> | 0.4   | 1              | "weight of sewage plant support" assigns the weight of sewage plant state in influencing the indicated sanitary condition. It is assumed to be 0.4 of the sanitary condition as the highest numbers of cholera cases have been reported in places where sewage treatment plants are non-functional. Without working sewage treatment plants, raw sewage is often diverted to poor neighborhoods and agricultural lands (leads to contamination of the shallow aquifers and wells) where local civilians and private tankers collect drinking water. Hence, the value is conceptualised with a higher weight than latrine use and other infrastructure states. More data/expert input is required for this parameter. |
| <b>Vaccination:</b>                   |       |                |                                                                                                                                                                                                                                                                                                                                                                                                                                                                                                                                                                                                                                                                                                                      |
| <b>"1_dose"</b>                       | 1     | vaccine/person | 1 dose of vaccine per person                                                                                                                                                                                                                                                                                                                                                                                                                                                                                                                                                                                                                                                                                         |
| <b>"1_dose_protection"</b>            | 180   | day            | <p>Although OCV currently used in mass campaigns are administered according to a two-dose regimen 14 days apart, a single dose provides short-term protection, with a pooled effectiveness of 69% (95% CI 35–85%) within the first year, which has important implications for outbreak management [28].</p> <p>MSF [4] reports that immunity develops one week after administration and lasts up to 6 months after a single dose and at least 3 years after 2 doses.</p>                                                                                                                                                                                                                                             |
| <b>"2_doses"</b>                      | 2     | vaccine/person | 2 doses of vaccines per person                                                                                                                                                                                                                                                                                                                                                                                                                                                                                                                                                                                                                                                                                       |
| <b>"2_doses_protection"</b>           | 365*3 | day            | <p>Potentially facing annual epidemics, it may be necessary to revaccinate at-risk populations every 2 y given that the duration of vaccine protection is about 2.5 to 3 years [27,29].</p> <p>They have an average two-dose efficacy of 58% (95% confidence interval [CI], 42–69%) and effectiveness of 76% (95% CI, 62–85%) for at least 3 years [12], with one study showing efficacy for up to 5 years[13]. Although OCV currently used in mass campaigns are administered according to a two-dose regimen 14 days apart, a single dose provides short-term protection, with a pooled effectiveness of 69% (95% CI 35–85%) within the first year,</p>                                                            |

|                                         |                                                                                                                                                                                                                                                                                                        |         |                                                                                                                                                                                                                                                                                                                                                                                                                                                                                                                                                                                                                                                                                                    |
|-----------------------------------------|--------------------------------------------------------------------------------------------------------------------------------------------------------------------------------------------------------------------------------------------------------------------------------------------------------|---------|----------------------------------------------------------------------------------------------------------------------------------------------------------------------------------------------------------------------------------------------------------------------------------------------------------------------------------------------------------------------------------------------------------------------------------------------------------------------------------------------------------------------------------------------------------------------------------------------------------------------------------------------------------------------------------------------------|
|                                         |                                                                                                                                                                                                                                                                                                        |         | which has important implications for outbreak management.                                                                                                                                                                                                                                                                                                                                                                                                                                                                                                                                                                                                                                          |
| <b>average_duration_of_protection</b>   | IF<br>switch_vaccine_dose=0<br>THEN<br>"1_dose_protection"<br>ELSE IF<br>switch_vaccine_dose=1<br>THEN<br>"2_doses_protection"<br>ELSE 0                                                                                                                                                               | day     | "average duration of protection" depends on 1 or 2 doses vaccination.                                                                                                                                                                                                                                                                                                                                                                                                                                                                                                                                                                                                                              |
| <b>data_vaccines</b>                    | 260000                                                                                                                                                                                                                                                                                                 | person  | According to UNICEF [20] situation report, WHO and UNICEF Yemen have supported the first round of an oral cholera vaccination campaign in five districts in the northern governorates of Al-hudaydah and Ibb to protect an additional 540,595 people (over 1 years of age) against Cholera. In total 387,390 (69 per cent) persons have been vaccinated (first dose) against the total target of 561,002 people. There is no data on dis-aggregation of Al-hudaydah and Ibb governorates. Hence, among the 3 districts, 2 are within Al-hudaydah, it is assumed that 260,000 first dose OCV distributed in Al-hudaydah with the total target of 370,000 people (from the total of 561,002 people). |
| <b>desired_number_of_vaccines</b>       | 260000                                                                                                                                                                                                                                                                                                 | vaccine | "desired number of vaccines" is initiated with the value 260000 from the historical data. The value can be changed to test the policy.                                                                                                                                                                                                                                                                                                                                                                                                                                                                                                                                                             |
| <b>fractional_vaccination</b>           | IF<br>switch_data_collection=0 THEN 0 ELSE (IF<br>switch_vaccination=1<br>THEN<br>data_vaccines/potential_vaccine_recipients/length_of_vaccination_campaign ELSE IF<br>switch_vaccination=2<br>THEN<br>number_of_vaccinated_people/potential_vaccine_recipients/length_of_vaccination_campaign ELSE 0) | 1/day   | "fractional vaccination" is rate that derived from dividing the number of vaccinated people over the campaign period (either from data or policy test input) with total population. This fraction draws number of person from the targeted stocks of sub-population into the vaccinated population stock.                                                                                                                                                                                                                                                                                                                                                                                          |
| <b>indicated_fractional_vaccination</b> | (STEP(fractional_vaccination*vaccine_effectiveness, indicated_vaccination_                                                                                                                                                                                                                             | 1/day   | "indicated fractional vaccination" is a rate that depends on both the vaccination start time (policy initiation) and the time to procure vaccines (delay). Step function is used to                                                                                                                                                                                                                                                                                                                                                                                                                                                                                                                |

|                                                 |                                                                                                                                                                                                                                                                                                                                                                                                                                                                                                                                                                                         |        |                                                                                                                                                       |
|-------------------------------------------------|-----------------------------------------------------------------------------------------------------------------------------------------------------------------------------------------------------------------------------------------------------------------------------------------------------------------------------------------------------------------------------------------------------------------------------------------------------------------------------------------------------------------------------------------------------------------------------------------|--------|-------------------------------------------------------------------------------------------------------------------------------------------------------|
|                                                 | start_time+time_to_procure_vaccines) +<br>STEP(-<br>fractional_vaccination*<br>vaccine_effectiveness,<br>vaccination_stop_time<br>+time_to_procure_vaccines))<br>+(interval_for_second_round_of_vaccination/<br>interval_for_second_round_of_vaccination)*<br>(STEP(fractional_vaccination*vaccine_effectiveness,<br>indicated_vaccination_start_time+time_to_procure_vaccines+interval_for_second_round_of_vaccination) + STEP(-<br>fractional_vaccination*<br>vaccine_effectiveness,<br>vaccination_stop_time<br>+time_to_procure_vaccines+interval_for_second_round_of_vaccination)) |        | enable the flows of individuals from the targeted stocks of sub-population into the vaccinated population stock.                                      |
| <b>indicated_vaccination_start_time</b>         | IF<br>switch_data_collection<br>=2 THEN<br>vaccination_start_time<br>+<br>(response_time_to_update_system) ELSE<br>vaccination_start_time                                                                                                                                                                                                                                                                                                                                                                                                                                               | day    | "vaccination start time" is the day when the campaign starts.                                                                                         |
| <b>interval_for_second_round_of_vaccination</b> | 0                                                                                                                                                                                                                                                                                                                                                                                                                                                                                                                                                                                       | day    |                                                                                                                                                       |
| <b>length_of_vaccination_campaign</b>           | 6                                                                                                                                                                                                                                                                                                                                                                                                                                                                                                                                                                                       | day    | "length of vaccination campaign" can be adjusted according to the health workers capacity. The value is set at a 6 days campaign in Al-hudaydah [20]. |
| <b>number_of_vaccinated_people</b>              | IF<br>switch_vaccine_dose=0<br>THEN<br>desired_number_of_vaccines/"1_dose" ELSE IF<br>switch_vaccine_dose=1<br>THEN                                                                                                                                                                                                                                                                                                                                                                                                                                                                     | person | Number of people vaccinated depends on the vaccine dose policy (switch)                                                                               |

|                                              |                                                                                                                     |                |                                                                                                                                                                                                                                                                                                                                                                                                        |
|----------------------------------------------|---------------------------------------------------------------------------------------------------------------------|----------------|--------------------------------------------------------------------------------------------------------------------------------------------------------------------------------------------------------------------------------------------------------------------------------------------------------------------------------------------------------------------------------------------------------|
|                                              | desired_number_of_vaccines/"2_doses" ELSE 0                                                                         |                |                                                                                                                                                                                                                                                                                                                                                                                                        |
| <b>potential_vaccine_recipients</b>          | recovered_asymptomatic_population + asymptomatic_population + susceptible_population + recently_infected_population | person         | Individuals who are perceived as potential recipients of vaccines are individuals who were not previously infected with cholera. Besides susceptible individuals, this population includes asymptomatic individuals (both currently infected and recovered) and recently infected individuals because they cannot be differentiated by healthcare providers since there is no test before inoculation. |
| <b>switch_vaccination</b>                    | 1                                                                                                                   | 1              | A switch to activate and deactivate the intervention                                                                                                                                                                                                                                                                                                                                                   |
| <b>switch_vaccine_dose</b>                   | 0                                                                                                                   | 1              | A switch for 1 or 2 doses OCV policy. 1 as 1 dose; 2 as 2 doses                                                                                                                                                                                                                                                                                                                                        |
| <b>time_to_procure_vaccines</b>              | 26                                                                                                                  | day            | "time to procure vaccines" is the delay from the day to request vaccines from global vaccine stockpile, to the day the vaccines delivered to the health workers before the vaccination campaigns. According to Pezzoli [28], in emergency settings, the longest delay was from the occurrence of the emergency to requesting OCV (median: 26 days). The parameter uses 26 days.                        |
| <b>vaccination_start_time</b>                | 600                                                                                                                 | day            | "vaccination start time" is the day when the campaign starts.                                                                                                                                                                                                                                                                                                                                          |
| <b>vaccination_stop_time</b>                 | indicated_vaccination_start_time+length_of_vaccination_campaign                                                     | day            | "vaccination stop time" is the day after the campaign ends.                                                                                                                                                                                                                                                                                                                                            |
| <b>vaccination_susceptible</b>               | susceptible_population*indicated_fractional_vaccination/1                                                           | person/day     | "vaccination susceptible" flow is the rate at which susceptible individuals leave the stock through multiplication with indicated fractional vaccination.                                                                                                                                                                                                                                              |
| <b>vaccine_effectiveness</b>                 | 0.76                                                                                                                | 1              | Not everyone vaccinated will be immune to infection. A recent meta-analysis of seven randomized trials and six observational studies estimates the mean effectiveness of standard two-dose killed oral cholera vaccination at 76% with protection lasting for at least 3 years [30]. Also, Fung [31] summarized five models on the Haitian cholera epidemic model parameters in Table (Table S2).      |
| <b>Water_provision:</b>                      |                                                                                                                     |                |                                                                                                                                                                                                                                                                                                                                                                                                        |
| <b>building_capacity_to_distribute_water</b> | (desired_water_distribution_capacity-capacity_to_distribute_water)/time_to_increase                                 | person/day/day | "building capacity to distribute water" is a goal seeking function at which the current capacity to distribute water is closing the gap with desired water distribution capacity                                                                                                                                                                                                                       |

|                                            |                                                                                                                                                               |             |                                                                                                                                                                                                                                                                                                                                                                                                                                                                                                                                                                                                                                           |
|--------------------------------------------|---------------------------------------------------------------------------------------------------------------------------------------------------------------|-------------|-------------------------------------------------------------------------------------------------------------------------------------------------------------------------------------------------------------------------------------------------------------------------------------------------------------------------------------------------------------------------------------------------------------------------------------------------------------------------------------------------------------------------------------------------------------------------------------------------------------------------------------------|
|                                            | se_distribution_capacity                                                                                                                                      |             | over the time to increase distribution capacity (first order delay).                                                                                                                                                                                                                                                                                                                                                                                                                                                                                                                                                                      |
| <b>capacity_to_distribute_water(t)</b>     | capacity_to_distribute_water(t - dt) + (building_capacity_to_distribute_water) * dt                                                                           | person /day | Taking into the implementation challenges such as delay in building capacity in supply side limitations, "capacity to distribute water" is expressed as number of people that can be provided with clean water.                                                                                                                                                                                                                                                                                                                                                                                                                           |
| <b>Data_clean_water_provision</b>          | GRAPH(TIME) Points(364): (0.0, 0), (1.00550964187, 0), (2.01101928375, 0), ...                                                                                | person /day | <p>Clean water provision intervention data were derived from OCHA [15]. The overtime data only available for 2017.</p> 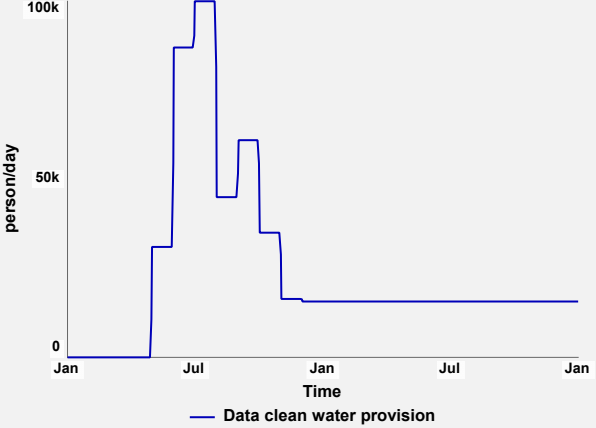 <p>— Data clean water provision</p>                                                                                                                                                                                                                                                                                                                                                                                            |
| <b>day</b>                                 | 1                                                                                                                                                             | day         | 1 day is used because water is daily essential need for human survival.                                                                                                                                                                                                                                                                                                                                                                                                                                                                                                                                                                   |
| <b>desired_water_distribution_capacity</b> | GRAPH(IF switch_data_collection =2 THEN TIME + (response_time_to_update_system) ELSE TIME) Points(728): (0.0, 0), (1.00412654746, 0), (2.00825309491, 0), ... | person /day | "desired water distribution capacity" is adjusted according to the number of susceptible individuals requiring clean water. The variable input is a graphical function that has included the intervention historical data in 2017. It can be changed to test the policy impacts. The intervention start time include response time (delay) from the surveillance system.                                                                                                                                                                                                                                                                  |
| <b>fractional_susceptible_population</b>   | susceptible_population /Total_Population                                                                                                                      | 1           | Fraction of population remaining susceptible to cholera.                                                                                                                                                                                                                                                                                                                                                                                                                                                                                                                                                                                  |
| <b>population_with_clean_water(t)</b>      | population_with_clean_water(t - dt) + (receiving_clean_water - stop_receiving_clean_water) * dt                                                               | person      | Cholera occurs in areas with poor access to sanitation and unsafe drinking water - so providing people with clean drinking water is vital to preventing and curbing any outbreaks. Clean Water Provision Intervention provides people with sachets to purify water, truck clean water in, and install, fix and clean out sanitation facilities such as toilets in affected areas. The epidemiology model by Tuite et al. [32] simplified the cholera water provision intervention with an assumption at which 100% reduction of "contact" rate if covered by clean water provision. Hence, in this model, a similar assumption is made to |

|                                                        |                                                                                                                                                                                                                                                                                                                                                                                  |            |                                                                                                                                                                                                                                                                                                                                                                                                                                                                                                                                                                                                                                           |
|--------------------------------------------------------|----------------------------------------------------------------------------------------------------------------------------------------------------------------------------------------------------------------------------------------------------------------------------------------------------------------------------------------------------------------------------------|------------|-------------------------------------------------------------------------------------------------------------------------------------------------------------------------------------------------------------------------------------------------------------------------------------------------------------------------------------------------------------------------------------------------------------------------------------------------------------------------------------------------------------------------------------------------------------------------------------------------------------------------------------------|
|                                                        |                                                                                                                                                                                                                                                                                                                                                                                  |            | represent the population with clean water. The initial value is 0. However, people who have clean water are still vulnerable to infection through other routes, such fecal-oral transmission (which is not within the boundary of this model).                                                                                                                                                                                                                                                                                                                                                                                            |
| <b>ratio_of_clean_water_in_reducing_susceptibility</b> | 0.7                                                                                                                                                                                                                                                                                                                                                                              | 1          | Compared to Tuite et al. [32] model on 100% reduction of "contact" rate if covered by clean water provision, this model assumes only 70% of individuals who receive clean water shift into the population with clean water stock. Having clean water does not ensure a 100% reduction in susceptibility [33]. In addition, not all the water provision goes directly to the susceptibility population. The water provision is shared among all SIR sub-populations since there is no disaggregation among the recipients in this model. Hence, only a fraction of individuals from the susceptible population stock receives clean water. |
| <b>receiving_clean_water</b>                           | IF<br>switch_data_collection<br>=0 THEN 0 ELSE (IF<br>switch_water_provision=1 THEN<br>Data_clean_water_provision*susceptible_population_receiving_water*ratio_of_clean_water_in_reducing_susceptibility ELSE IF<br>switch_water_provision=2 THEN<br>capacity_to_distribute_water*susceptible_population_receiving_water*ratio_of_clean_water_in_reducing_susceptibility ELSE 0) | person/day | "receiving clean water" flow is the rate at which a fraction of susceptible population is receiving water based on the capacity to distribute water (supply).<br><br>IF switch_water_provision=1 THEN<br>"WASH_support_(data)"*susceptible_population_receiving_water ELSE<br>IF switch_water_provision=2 THEN<br>capacity_to_distribute_water*susceptible_population_receiving_water ELSE 0                                                                                                                                                                                                                                              |
| <b>stop_receiving_clean_water</b>                      | population_with_clean_water/day                                                                                                                                                                                                                                                                                                                                                  | person/day | "stop receiving clean water" flow is the rate at which individuals who had received clean water leave the stock after one day (material delay) once they no longer provided with water. They become susceptible to cholera again.                                                                                                                                                                                                                                                                                                                                                                                                         |
| <b>susceptible_population_receiving_water</b>          | fractional_susceptible_population                                                                                                                                                                                                                                                                                                                                                | 1          | "susceptible population receiving water" is the fractional susceptible population. This is an assumption of water is provided to the population without knowing who are the receivers. It is unrealistic to model all water provision goes to the susceptible population. Hence, only a fraction of the intervention is able to impact the population by reducing their susceptibility to cholera.                                                                                                                                                                                                                                        |

|                                               |    |     |                                                                                                                                                                                |
|-----------------------------------------------|----|-----|--------------------------------------------------------------------------------------------------------------------------------------------------------------------------------|
| <b>switch_water_provision</b>                 | 1  | 1   | A switch to activate and deactivate the intervention                                                                                                                           |
| <b>time_to_increase_distribution_capacity</b> | 14 | day | "time to increase distribution capacity" is an assumptive duration (days) needed to increase the current capacity to meet the need from "desired water distribution capacity". |

| Run Specs                                   |       |
|---------------------------------------------|-------|
| <b>Start Time</b>                           | 0     |
| <b>Stop Time</b>                            | 730   |
| <b>DT</b>                                   | 1/4   |
| <b>Fractional DT</b>                        | True  |
| <b>Save Interval</b>                        | 0.25  |
| <b>Sim Duration</b>                         | 0     |
| <b>Time Units</b>                           | Day   |
| <b>Pause Interval</b>                       | 0     |
| <b>Integration Method</b>                   | Euler |
| <b>Keep all variable results</b>            | True  |
| <b>Run By</b>                               | Run   |
| <b>Calculate loop dominance information</b> | True  |
| <b>Exhaustive Search Threshold</b>          | 1000  |

## References

1. Leung, T.; Matrajt, L. Protection Afforded by Previous *Vibrio Cholerae* Infection against Subsequent Disease and Infection: A Review. *PLoS Negl. Trop. Dis.* **2021**, *15*, e0009383. <https://doi.org/10.1371/journal.pntd.0009383>.
2. Chao, D.L.; Halloran, M.E.; Longini, I.M. Vaccination Strategies for Epidemic Cholera in Haiti with Implications for the Developing World. *Proc. Natl. Acad. Sci. USA* **2011**, *108*, 7081–7085. <https://doi.org/doi:10.1073/pnas.1102149108>.
3. Nelson, E.J.; Harris, J.B.; Morris, J.G., Jr.; Calderwood, S.B.; Camilli, A. Cholera Transmission: The Host, Pathogen and Bacteriophage Dynamic. *Nat. Rev. Microbiol.* **2009**, *7*, 693–702. <https://doi.org/10.1038/nrmicro2204>.
4. Médecins Sans Frontières. Management of a Cholera Epidemic. 2018th ed. 2018. <https://medicalguidelines.msf.org/viewport/CHOL/english/management-of-a-cholera-epidemic-23444438.html> (accessed on 20 September 2022).
5. Centers for Disease Control and Prevention. Antibiotic Treatment. Available online: <https://www.cdc.gov/cholera/treatment/antibiotic-treatment.html> (accessed on 20 September 2022).
6. World Health Organization. Cholera Situation in Yemen December 2020 [Infographic]. Available online: <https://applications.emro.who.int/docs/WHOEMCSR314E-eng.pdf?ua=1> (accessed on 20 September 2022).



7. Kaper, J.B.; Morris, J.G., Jr.; Levine, M.M. Cholera. *Clin. Microbiol. Rev.* **1995**, *8*, 48–86. <https://doi.org/10.1128/CMR.8.1.48>.
8. Okoh, A.I.; Sibanda, T.; Nongogo, V.; Adefisoye, M.; Olayemi, O.O.; Nontongana, N. Prevalence and Characterisation of Non-Cholerae Vibrio Spp. in Final Effluents of Wastewater Treatment Facilities in Two Districts of the Eastern Cape Province of South Africa: Implications for Public Health. *Environ. Sci. Pollut. Res.* **2015**, *22*, 2008–2017. <https://doi.org/10.1007/s11356-014-3461-z>.
9. Pruyt, E. Small System Dynamics Models for Big Issues: Triple Jump towards Real-World Complexity; TU Delft Library: Delft, The Netherlands, 2013.
10. International Organization for Migration. Task Force for Population Movement Yemen August 2018. 2021. Available online: <https://displacement.iom.int/yemen> (accessed on 20 September 2022).
11. Camacho, A.; Bouhenia, M.; Alyusfi, R.; Alkohani, A.; Naji, M.A.M.; de Radiguès, X.; Abubakar, A.M.; Almoalmi, A.; Seguin, C.; Sagrado, M.J.; et al. Cholera Epidemic in Yemen, 2016–2018: An Analysis of Surveillance Data. *Lancet Glob. Health* **2018**, *6*, e680–e690. [https://doi.org/10.1016/S2214-109X\(18\)30230-4](https://doi.org/10.1016/S2214-109X(18)30230-4).
12. Ali, A. IDPs in Hudaydah: Where Aid, Protection Don't Always Reach; 2021. Available online: <https://sanaacenter.org/ypf/idps-in-hudaydah/> (accessed on 20 September 2022).
13. Spiegel, P.; Ratnayake, R.; Hellman, N.; Lantagne, D.S.; Ververs, M.; Ngwa, M.; Wise, P.H. *Cholera in Yemen: A Case Study of Epidemic Preparedness and Response*; Johns Hopkins Center for Humanitarian Health: Baltimore, MD, USA, 2018.
14. Qadri, F.; Islam, T.; Clemens, J.D. Cholera in Yemen—An Old Foe Rearing Its Ugly Head. *N. Engl. J. Med.* **2017**, *377*, 2005–2007. <https://doi.org/10.1056/NEJMp1712099>.
15. United Nations Office for the Coordination of Humanitarian Affairs. Yemen: Cholera Outbreak Tracker Governorate Profiles. Available online: [https://public.tableau.com/views/001CholeraYemenTracker/FacilityBaseline?%3Aembed=y&%3AshowVizHome=no&%3Adisplay\\_count=y&%3Adisplay\\_static\\_image=y#!%2Fpublish-confirm](https://public.tableau.com/views/001CholeraYemenTracker/FacilityBaseline?%3Aembed=y&%3AshowVizHome=no&%3Adisplay_count=y&%3Adisplay_static_image=y#!%2Fpublish-confirm) (accessed on 20 September 2022).
16. LaRocque, R.; Harris, J.B. Cholera: Clinical Features, Diagnosis, Treatment, and Prevention. This Top. Available online: <https://www.uptodate.com/contents/cholera-clinical-features-diagnosis-treatment-and-prevention> (accessed on 20 September 2022).
17. Stermann, J. Business Dynamics. Systems Thinking and Modeling for a Complex World; McGraw Hill Higher Education: Boston, MA, USA, 2000.
18. McCrickard, L.; Massay, A.E.; Narra, R.; Mghamba, J.; Mohamed, A.A.; Kishimba, R.S.; Urio, L.J.; Rusibayamila, N.; Magembe, G.; Bakari, M.; et al. Cholera Mortality during Urban Epidemic, Dar Es Salaam, Tanzania, August 16, 2015–January 16, 2016. *Emerg. Infect. Dis. J.* **2017**, *23*, 13. <https://doi.org/10.3201/eid2313.170529>.
19. Emergency Operation Center. Cholera Response Health Actors and Partner Activities. 2021. Available online: <https://app.powerbi.com/view?r=eyJrJoiNTY3YmU0NTItMmFjYy00OTUxLWI2NzEtOTU5N2Q0MDBjMjE5IiwidCI6ImI3ZTNiYmJjLTE2ZTctNGVmMi05NmE5LTVhODc4ZDg3MDM5ZCIsImMiOiJ9> (accessed on 20 September 2022).
20. UNICEF. UNICEF Yemen Humanitarian Situation Report. Available online: [https://reliefweb.int/sites/reliefweb.int/files/resources/UNICEF\\_Yemen\\_Humanitarian\\_Situation\\_Report-August\\_2018.pdf](https://reliefweb.int/sites/reliefweb.int/files/resources/UNICEF_Yemen_Humanitarian_Situation_Report-August_2018.pdf) (accessed on 20 September 2022).
21. Ochoa, B.; Surawicz, C.M. Diarrheal Diseases—Acute and Chronic. Available online: <https://gi.org/topics/diarrhea-acute-and-chronic/> (accessed on 20 September 2022).
22. Michas, F. Number of Patients That Physicians in the U.S. Saw per Day from 2012 to 2018. 2020. Available online: <https://www.statista.com/statistics/613959/us-physicians-patients-seen-per-day/> (accessed on 20 September 2022).
23. Burki, T. Yemen's Neglected Health and Humanitarian Crisis. *Lancet* **2016**, *387*, 734–735. [https://doi.org/https://doi.org/10.1016/S0140-6736\(16\)00389-5](https://doi.org/https://doi.org/10.1016/S0140-6736(16)00389-5).
24. Günther, I.; Niwagaba, C.B.; Lüthi, C.; Horst, A.; Mosler, H.-J.; Tumwebaze, I.K. When Is Shared Sanitation Improved Sanitation?—The Correlation between Number of Users and Toilet Hygiene. 2012. Available online: <https://www.ircwash.org/resources/when-shared-sanitation-improved-sanitation-correlation-between-number-users-and-toilet> (accessed on 22 September 2022).

25. Worldbank. People Practicing Open Defecation, Urban (% of urban population)-Yemen, Rep. Available online: <https://data.worldbank.org/indicator/SH.STA.ODFC.UR.ZS?locations=YE> (accessed on 20 September 2022).
26. Ministry of Electricity and Water. Environmental Impact Assessment. Available online: Chrome-extension://efaidnbmnnnibpcajpcgclefindmkaj/<https://documents1.worldbank.org/curated/en/279131468335060537/pdf/E4940V60P0576020Box353756B01PUBLIC1.pdf> (accessed on 20 September 2022).
27. UNICEF. UNICEF Cholera Toolkit 2013. Available online: <https://sites.unicef.org/cholera/Cholera-Toolkit-2013.pdf> (accessed on 20 September 2022).
28. Pezzoli, L. Global Oral Cholera Vaccine Use, 2013–2018. *Vaccine* **2020**, *38*, A132–A140. <https://doi.org/https://doi.org/10.1016/j.vaccine.2019.08.086>.
29. Durham, L.K.; Longini, I.M., Jr.; Halloran, M.E.; Clemens, J.D.; Azhar, N.; Rao, M. Estimation of Vaccine Efficacy in the Presence of Waning: Application to Cholera Vaccines. *Am. J. Epidemiol.* **1998**, *147*, 948–959.
30. Shim, E.; Galvani, A.P. Distinguishing Vaccine Efficacy and Effectiveness. *Vaccine* **2012**, *30*, 6700–6705. <https://doi.org/10.1016/j.vaccine.2012.08.045>.
31. Fung, I.C.-H. Cholera Transmission Dynamic Models for Public Health Practitioners. *Emerg. Themes Epidemiol.* **2014**, *11*, 1. <https://doi.org/10.1186/1742-7622-11-1>.
32. Tuite, A.R.; Tien, J.; Eisenberg, M.; Earn, D.J.; Ma, J.; Fisman, D.N. Cholera Epidemic in Haiti, 2010: Using a Transmission Model to Explain Spatial Spread of Disease and Identify Optimal Control Interventions. *Ann. Intern. Med.* **2011**, *154*, 593–601. <https://doi.org/10.7326/0003-4819-154-9-201105030-00334>.
33. Wolfe, M.; Kaur, M.; Yates, T.; Woodin, M.; Lantagne, D. A Systematic Review and Meta-Analysis of the Association between Water, Sanitation, and Hygiene Exposures and Cholera in Case-Control Studies. *Am. J. Trop. Med. Hyg.* **2018**, *99*, 534–545. <https://doi.org/10.4269/ajtmh.17-0897>.
